# Supplementary material for: Risk factors associated with revision for prosthetic joint infection following knee replacement: an observational cohort study from England and Wales
Source: PubMed Central journal article supplement (PMC6531378; doi:10.1016/s1473-3099(18)30755-2), 2019-06
Supplement: mmc1.pdf [file mmc1.pdf]

# THE LANCET Infectious Diseases

## Supplementary webappendix

This webappendix formed part of the original submission and has been peer reviewed. We post it as supplied by the authors.

Supplement to: Lenguerrand E, Whitehouse MR, Beswick AD, et al, on behalf of the National Joint Registry for England, Wales, Northern Ireland and the Isle of Man. Risk factors associated with revision for prosthetic joint infection following knee replacement: an observational cohort study from England and Wales. *Lancet Infect Dis* 2019; published online April 17. [http://dx.doi.org/10.1016/S1473-3099\(18\)30755-2](http://dx.doi.org/10.1016/S1473-3099(18)30755-2).

## Web extra materials

### Appendix 1

Patients with incompletely registered two-stage procedures did not differ from those with complete information at the time of their index surgery in terms of age ( $\geq 80$ y: 8% vs 8%;  $\leq 60$ y: 22% vs 21%), sex (female: 43% vs 41%), BMI ( $< 25$ kg/m<sup>2</sup>: 8% vs 8%;  $\geq 30$ kg/m<sup>2</sup>: 61% vs 60%), American Society of Anaesthesiologists (ASA) Physical Status grade ( $>P2$ : 20% vs 19%), or type of surgery (cemented total knee replacement: 90% vs 86%; uncemented total knee replacement: 4% vs 5%; unicondylar: 4% vs 6%, patellofemoral: 0.4% vs 0.4%).

For patients with incompletely registered two-stage revision procedures, the date of the first revision operation and the period they had been at risk of revision for PJI were estimated. We initially derived the relative weight of time elapsed between the index and the first operation by year and type of index surgery using patients with complete information:  $100 \times (\text{length of time}_{\text{index surgery- 1st operation}} / \text{length of time}_{\text{index surgery- 2nd operation}})$ . We then applied these weights to the length of time between the index and the second procedure for those with incomplete information to obtain an estimated “index surgery–1<sup>st</sup> operation” duration.

## Appendix 2

Data on comorbidity were derived from the HES records. HES hospital admissions were linked to the NJR using a common anonymised patient identifier provided to NJR end-user by Northgate. The presence of each of the following comorbidities was identified using the ICD-10 codes associated with each hospital admission which occurred in the five years preceding the date of the primary replacement recorded in the NJR. The PEDW records were similarly linked but the dates of hospital admission were either missing or incomplete in the data extract available to us for numerous records preventing the accurate derivation of the five-year comorbidity presence. The comorbidity profile of patients with records in PEDW and/or operated in Wales could not be established with accuracy.

The analysis of the effect of specific comorbidity on revision for PJI was therefore restricted to patients with a knee replacement performed in England with linked HES record(s), with no record in the PEDW and no evidence of residency outside England. In other words, patients with their knee replacement performed in England but with PEDW record(s), patients with their knee replacement performed in Wales with or without PEDW/HES record(s) and patients with evidence of residency outside England were excluded. Moreover to reduce a risk of misclassification bias, patients operated in England with unlinked HES or PEDW record(s) could not be included in these analyses, i.e. they were not accounted as healthy patients: It was impossible to disentangle those who were genuinely healthy (i.e. absence of HES and PEDW record=true absence of any hospitalisation) from those who had been admitted to the hospital for any reason but for whom linkage between their NJR and HES/PEDW records could not be established (either due to missing data in the HES/PEDW file or of absence of match with the linkage method used by Northgate). No major evidence of difference was identified between included (n=557,426, figure1) and excluded (n=679,010-557,426=121,584, figure1) patients: median age 69y vs 68y, Male=43% vs 44%, median BMI 30 vs 30. However, those included had higher ASA grade (healthy patient(ASA=1): 13% vs 19%; mild systemic disease (ASA=2): 72% vs 69%; severe systemic disease (ASA=3): 15% vs 11%). This is expected as patients with HES records have at least one comorbidity and as explained above, those without a HES record are for some of them “healthy” patients with no comorbidity which had required an hospital admission.

The comorbidities considered were derived from the Charlson comorbidity index using the following ICD-10 codes:

- Myocardial infarction: I21.x, I22.x, I25.2
- Congestive heart failure: I09.9, I11.0, I13.0, I13.2, I25.5, I42.0, I42.5–I42.9, I43.x, I50.x, P29.0
- Peripheral vascular disease: I70.x, I71.x, I73.1, I73.8, I73.9, I77.1, I79.0, I79.2, K55.1, K55.8, K55.9, Z95.8, Z95.9
- Cerebrovascular disease: G45.x, G46.x, H34.0, I60.x–I69.x
- Dementia: F00.x–F03.x, F05.1, G30.x, G31.1
- Chronic pulmonary disease: I27.8, I27.9, J40.x–J47.x, J60.x–J67.x, J68.4, J70.1, J70.3
- Connective tissue disease or rheumatic disease: M05.x, M06.x, M31.5, M32.x–M34.x, M35.1, M35.3, M36.0
- Peptic ulcer disease: K25.x–K28.x
- Liver disease(mild and moderate or severe): B18.x, K70.0–K70.3, K70.9, K71.3–K71.5, K71.7, K73.x, K74.x, K76.0, K76.2–K76.4, K76.8, K76.9, Z94.4 + I85.0, I85.9, I86.4, I98.2, K70.4, K71.1, K72.1, K72.9, K76.5, K76.6, K76.7
- Diabetes (with and without chronic complication): E10.0, E10.1, E10.6, E10.8, E10.9, E11.0, E11.1, E11.6, E11.8, E11.9, E12.0, E12.1, E12.6, E12.8, E12.9, E13.0, E13.1, E13.6, E13.8, E13.9, E14.0, E14.1, E14.6, E14.8, E14.9+ E10.2–E10.5, E10.7, E11.2–E11.5, E11.7, E12.2–E12.5, E12.7, E13.2– E13.5, E13.7, E14.2–E14.5, E14.7
- Hemiplegia or paraplegia: G04.1, G11.4, G80.1, G80.2, G81.x, G82.x, G83.0–G83.4, G83.9
- Renal disease: I12.0, I13.1, N03.2–N03.7, N05.2– N05.7, N18.x, N19.x, N25.0, Z49.0– Z49.2, Z94.0, Z99.2
- Cancer(any malignancy and metastatic solid tumour): C00.x–C26.x, C30.x–C34.x, C37.x– C41.x, C43.x, C45.x– C58.x, C60.x– C76.x, C81.x–C85.x, C88.x, C90.x–C97.x+ C77.x–C80.x
- AIDS/HIV: B20.x–B22.x, B24.x

HIV/AIDS as a comorbidity group was not considered further in this research as only 45 patients had been admitted for this indication with none revised for a PJI

Methods of fixation and constraint of the implant were identified from the surgical approach section in the NJR data collection form and confirmed by the surgical procedure as identified from the dedicated field in the NJR form and from the component list of implants recorded in the component label section. Thromboprophylaxis regime was = classified as chemical (use of any chemical agent) and non-chemical (any other strategy). An intra-operative event was defined as the presence of any type of event reported by the surgeon. The grade, presence and surgical volume of a surgeon was derived using the anonymised ID of each surgeon. The place of surgery was identified using the post code of the hospital.



**Appendix Table 1: Sample description and incidence rates by period of revision for PJI from the index procedures\***

|                                                |                   | 0-3 months   |       |                        |                    | 3-6 months   |       |           |               |
|------------------------------------------------|-------------------|--------------|-------|------------------------|--------------------|--------------|-------|-----------|---------------|
|                                                |                   | Person-years | Cases | Incidence <sup>1</sup> | 95%CI <sup>2</sup> | Person-years | Cases | Incidence | 95%CI         |
| <b>Patient characteristics</b>                 |                   |              |       |                        |                    |              |       |           |               |
| <b>Sex</b>                                     | Female            | 94,880       | 91    | 0.96                   | [0.77, 1.18]       | 94,604       | 91    | 0.96      | [0.77, 1.18]  |
|                                                | Male              | 71,928       | 154   | 2.14                   | [1.82, 2.51]       | 71,630       | 147   | 2.05      | [1.73, 2.41]  |
| <b>Age</b>                                     | <60               | 26,824       | 35    | 1.30                   | [0.91, 1.81]       | 26,767       | 52    | 1.94      | [1.45, 2.55]  |
|                                                | [60-69]           | 56,359       | 80    | 1.42                   | [1.13, 1.77]       | 56,248       | 70    | 1.24      | [0.97, 1.57]  |
|                                                | [70-79]           | 60,830       | 83    | 1.36                   | [1.09, 1.69]       | 60,618       | 87    | 1.44      | [1.15, 1.77]  |
|                                                | ≥80               | 22,795       | 47    | 2.06                   | [1.51, 2.74]       | 22,602       | 29    | 1.28      | [0.86, 1.84]  |
| <b>Ethnicity</b>                               | White             | 126,553      | 190   | 1.50                   | [1.30, 1.73]       | 126,126      | 192   | 1.52      | [1.31, 1.75]  |
|                                                | Black Afr. origin | 1,475        | 3     | 2.03                   | [0.42, 5.94]       | 1,472        | 4     | 2.72      | [0.74, 6.96]  |
|                                                | South Asian       | 3,809        | 7     | 1.84                   | [0.74, 3.79]       | 3,798        | 10    | 2.63      | [1.26, 4.84]  |
|                                                | Other and mixed   | 1,600        | 3     | 1.87                   | [0.39, 5.48]       | 1,597        | 2     | 1.25      | [0.15, 4.53]  |
|                                                | Unclear           | 3,501        | 1     | 0.29                   | [0.01, 1.59]       | 3,483        | 2     | 0.57      | [0.07, 2.07]  |
| <b>BMI<sup>3</sup></b>                         | <25               | 9,901        | 11    | 1.11                   | [0.55, 1.99]       | 9,856        | 15    | 1.52      | [0.85, 2.51]  |
|                                                | [25-29.9]         | 32,333       | 55    | 1.70                   | [1.28, 2.21]       | 32,228       | 66    | 2.05      | [1.58, 2.61]  |
|                                                | ≥30               | 50,431       | 111   | 2.20                   | [1.81, 2.65]       | 50,293       | 89    | 1.77      | [1.42, 2.18]  |
|                                                | Missing           | 74,144       | 68    | 0.92                   | [0.71, 1.16]       | 73,857       | 68    | 0.92      | [0.71, 1.17]  |
| <b>ASA grade<sup>4</sup></b>                   | 1                 | 22,736       | 26    | 1.14                   | [0.75, 1.68]       | 22,682       | 28    | 1.23      | [0.82, 1.78]  |
|                                                | 2                 | 119,193      | 164   | 1.38                   | [1.17, 1.60]       | 118,840      | 162   | 1.36      | [1.16, 1.59]  |
|                                                | 3-5               | 24,879       | 55    | 2.21                   | [1.67, 2.88]       | 24,712       | 48    | 1.94      | [1.43, 2.58]  |
| <b>Chronic Pulmonary Disease</b>               | No                | 117,631      | 169   | 1.44                   | [1.23, 1.67]       | 117,251      | 168   | 1.43      | [1.22, 1.67]  |
|                                                | Yes               | 19,308       | 35    | 1.81                   | [1.26, 2.52]       | 19,225       | 42    | 2.18      | [1.57, 2.95]  |
| <b>Diabetes</b>                                | No                | 120,527      | 178   | 1.48                   | [1.27, 1.71]       | 120,136      | 175   | 1.46      | [1.25, 1.69]  |
|                                                | Yes               | 16,412       | 26    | 1.58                   | [1.03, 2.32]       | 16,340       | 35    | 2.14      | [1.49, 2.98]  |
| <b>Dementia</b>                                | No                | 136,539      | 202   | 1.48                   | [1.28, 1.70]       | 136,084      | 208   | 1.53      | [1.33, 1.75]  |
|                                                | Yes               | 400          | 2     | 5.00                   | [0.61, 18.06]      | 392          | 2     | 5.11      | [0.62, 18.45] |
| <b>Liver Disease</b>                           | No                | 135,951      | 202   | 1.49                   | [1.29, 1.71]       | 135,496      | 207   | 1.53      | [1.33, 1.75]  |
|                                                | Yes               | 987          | 2     | 2.03                   | [0.25, 7.32]       | 980          | 3     | 3.06      | [0.63, 8.95]  |
| <b>Congestive Heart Failure</b>                | No                | 134,325      | 194   | 1.44                   | [1.25, 1.66]       | 133,899      | 205   | 1.53      | [1.33, 1.76]  |
|                                                | Yes               | 2,614        | 10    | 3.83                   | [1.83, 7.03]       | 2,576        | 5     | 1.94      | [0.63, 4.53]  |
| <b>Connective Tissue-Rheumatologic Disease</b> | No                | 129,349      | 185   | 1.43                   | [1.23, 1.65]       | 128,924      | 191   | 1.48      | [1.28, 1.71]  |
|                                                | Yes               | 7,590        | 19    | 2.50                   | [1.51, 3.91]       | 7,552        | 19    | 2.52      | [1.51, 3.93]  |
| <b>Cancer</b>                                  | No                | 131,325      | 196   | 1.49                   | [1.29, 1.72]       | 130,905      | 201   | 1.54      | [1.33, 1.76]  |
|                                                | Cancer            | 4,996        | 6     | 1.20                   | [0.44, 2.61]       | 4,962        | 6     | 1.21      | [0.44, 2.63]  |
|                                                | Metastatic        | 618          | 2     | 3.24                   | [0.39, 11.69]      | 609          | 3     | 4.93      | [1.02, 14.40] |
| <b>Cerebrovascular Disease</b>                 | No                | 134,171      | 197   | 1.47                   | [1.27, 1.69]       | 133,734      | 203   | 1.52      | [1.32, 1.74]  |
|                                                | Yes               | 2,768        | 7     | 2.53                   | [1.02, 5.21]       | 2,741        | 7     | 2.55      | [1.03, 5.26]  |
| <b>Myocardial Infarction</b>                   | No                | 133,151      | 196   | 1.47                   | [1.27, 1.69]       | 132,716      | 208   | 1.57      | [1.36, 1.80]  |
|                                                | Yes               | 3,788        | 8     | 2.11                   | [0.91, 4.16]       | 3,759        | 2     | 0.53      | [0.06, 1.92]  |
| <b>Paraplegia and Hemiplegia</b>               | No                | 136,402      | 201   | 1.47                   | [1.28, 1.69]       | 135,944      | 208   | 1.53      | [1.33, 1.75]  |
|                                                | Yes               | 537          | 3     | 5.59                   | [1.15, 16.34]      | 532          | 2     | 3.76      | [0.46, 13.59] |
| <b>Peptic Ulcer Disease</b>                    | No                | 134,893      | 196   | 1.45                   | [1.26, 1.67]       | 134,442      | 208   | 1.55      | [1.34, 1.77]  |
|                                                | Yes               | 2,046        | 8     | 3.91                   | [1.69, 7.71]       | 2,034        | 2     | 0.98      | [0.12, 3.55]  |
| <b>Peripheral Vascular Disease</b>             | No                | 134,416      | 200   | 1.49                   | [1.29, 1.71]       | 133,973      | 202   | 1.51      | [1.31, 1.73]  |
|                                                | Yes               | 2,523        | 4     | 1.59                   | [0.43, 4.06]       | 2,503        | 8     | 3.20      | [1.38, 6.30]  |
| <b>Renal Disease</b>                           | No                | 132,600      | 195   | 1.47                   | [1.27, 1.69]       | 132,178      | 202   | 1.53      | [1.32, 1.75]  |
|                                                | Yes               | 4,339        | 9     | 2.07                   | [0.95, 3.94]       | 4,297        | 8     | 1.86      | [0.80, 3.67]  |
| <b>Surgical characteristics</b>                |                   |              |       |                        |                    |              |       |           |               |
| <b>Osteoarthritis</b>                          | No                | 4,547        | 10    | 2.20                   | [1.05, 4.04]       | 4,518        | 11    | 2.43      | [1.22, 4.36]  |
|                                                | Yes               | 162,262      | 235   | 1.45                   | [1.27, 1.65]       | 161,717      | 227   | 1.40      | [1.23, 1.60]  |
| <b>Trauma</b>                                  | No                | 165,874      | 243   | 1.46                   | [1.29, 1.66]       | 165,307      | 236   | 1.43      | [1.25, 1.62]  |

|                                      |                             |         |     |      |               |         |     |       |               |
|--------------------------------------|-----------------------------|---------|-----|------|---------------|---------|-----|-------|---------------|
|                                      | Yes                         | 934     | 2   | 2.14 | [0.26, 7.73]  | 927     | 2   | 2.16  | [0.26, 7.79]  |
| <b>Previous knee infection</b>       | No                          | 166,688 | 244 | 1.46 | [1.29, 1.66]  | 166,116 | 236 | 1.42  | [1.25, 1.61]  |
|                                      | Yes                         | 120     | 1   | 8.33 | [0.21, 46.41] | 119     | 2   | 16.81 | [2.04, 60.71] |
| <b>Avascular necrosis</b>            | No                          | 166,196 | 244 | 1.47 | [1.29, 1.66]  | 165,625 | 236 | 1.42  | [1.25, 1.62]  |
|                                      | Yes                         | 613     | 1   | 1.63 | [0.04, 9.09]  | 610     | 2   | 3.28  | [0.40, 11.85] |
| <b>Inflammatory arthropathy</b>      | No                          | 162,980 | 236 | 1.45 | [1.27, 1.65]  | 162,426 | 228 | 1.40  | [1.23, 1.60]  |
|                                      | Yes                         | 3,829   | 9   | 2.35 | [1.07, 4.46]  | 3,808   | 10  | 2.63  | [1.26, 4.83]  |
| <b>Other indication</b>              | No                          | 165,900 | 244 | 1.47 | [1.29, 1.67]  | 165,334 | 236 | 1.43  | [1.25, 1.62]  |
|                                      | Yes                         | 908     | 1   | 1.10 | [0.03, 6.14]  | 901     | 2   | 2.22  | [0.27, 8.02]  |
| <b>Surgical approach</b>             | Medial parapatellar         | 154,743 | 227 | 1.47 | [1.28, 1.67]  | 154,213 | 214 | 1.39  | [1.21, 1.59]  |
|                                      | Mid Vastus                  | 4,764   | 6   | 1.26 | [0.46, 2.74]  | 4,750   | 5   | 1.05  | [0.34, 2.46]  |
|                                      | Lateral parapatellar        | 1,961   | 4   | 2.04 | [0.56, 5.22]  | 1,949   | 11  | 5.65  | [2.82, 10.10] |
|                                      | Sub Vastus                  | 2,309   | 3   | 1.30 | [0.27, 3.80]  | 2,300   | 3   | 1.30  | [0.27, 3.81]  |
|                                      | Other approach              | 3,031   | 5   | 1.65 | [0.54, 3.85]  | 3,022   | 5   | 1.65  | [0.54, 3.86]  |
| <b>Procedure<sup>5</sup></b>         | Prim TKR cemented           | 139,945 | 218 | 1.56 | [1.36, 1.78]  | 139,463 | 195 | 1.40  | [1.21, 1.61]  |
|                                      | Prim TKR uncemented         | 8,291   | 11  | 1.33 | [0.66, 2.37]  | 8,259   | 18  | 2.18  | [1.29, 3.44]  |
|                                      | Prim TKR other              | 1,891   | 3   | 1.59 | [0.33, 4.64]  | 1,885   | 1   | 0.53  | [0.01, 2.96]  |
|                                      | Unicondylar                 | 14,484  | 13  | 0.90 | [0.48, 1.53]  | 14,437  | 23  | 1.59  | [1.01, 2.39]  |
|                                      | Patellofemoral              | 2,197   | 0   |      |               | 2,190   | 1   | 0.46  | [0.01, 2.54]  |
| <b>Constraint</b>                    | Unconstrained Fixed         | 97,580  | 132 | 1.35 | [1.13, 1.60]  | 97,267  | 123 | 1.26  | [1.05, 1.51]  |
|                                      | Unconstrained Mobile        | 11,674  | 20  | 1.71 | [1.05, 2.65]  | 11,634  | 19  | 1.63  | [0.98, 2.55]  |
|                                      | Posterior Stabilised Fixed  | 35,603  | 65  | 1.83 | [1.41, 2.33]  | 35,471  | 59  | 1.66  | [1.27, 2.15]  |
|                                      | Posterior Stabilised Mobile | 2,387   | 3   | 1.26 | [0.26, 3.67]  | 2,379   | 3   | 1.26  | [0.26, 3.68]  |
|                                      | Constrained Condylar        | 724     | 4   | 5.52 | [1.50, 14.14] | 717     | 3   | 4.18  | [0.86, 12.22] |
|                                      | Fixed                       | 4,110   | 8   | 1.95 | [0.84, 3.84]  | 4,098   | 7   | 1.71  | [0.69, 3.52]  |
|                                      | Mobile                      | 10,157  | 5   | 0.49 | [0.16, 1.15]  | 10,122  | 15  | 1.48  | [0.83, 2.44]  |
|                                      | Undetermined                | 4,574   | 8   | 1.75 | [0.76, 3.45]  | 4,547   | 9   | 1.98  | [0.91, 3.76]  |
| <b>General Anaesthesia</b>           | No                          | 93,638  | 138 | 1.47 | [1.24, 1.74]  | 93,316  | 123 | 1.32  | [1.10, 1.57]  |
|                                      | Yes                         | 73,170  | 107 | 1.46 | [1.20, 1.77]  | 72,919  | 115 | 1.58  | [1.30, 1.89]  |
| <b>Nerve Block Anaesthesia</b>       | No                          | 134,571 | 193 | 1.43 | [1.24, 1.65]  | 134,106 | 193 | 1.44  | [1.24, 1.66]  |
|                                      | Yes                         | 32,238  | 52  | 1.61 | [1.20, 2.12]  | 32,129  | 45  | 1.40  | [1.02, 1.87]  |
| <b>Epidural Anaesthesia</b>          | No                          | 152,709 | 233 | 1.53 | [1.34, 1.73]  | 152,190 | 217 | 1.43  | [1.24, 1.63]  |
|                                      | Yes                         | 14,100  | 12  | 0.85 | [0.44, 1.49]  | 14,045  | 21  | 1.50  | [0.93, 2.29]  |
| <b>Spinal Anaesthesia</b>            | No                          | 69,543  | 97  | 1.39 | [1.13, 1.70]  | 69,298  | 113 | 1.63  | [1.34, 1.96]  |
|                                      | Yes                         | 97,266  | 148 | 1.52 | [1.29, 1.79]  | 96,936  | 125 | 1.29  | [1.07, 1.54]  |
| <b>Thromboprophylaxis regimen</b>    | Chemical                    | 148,887 | 218 | 1.46 | [1.28, 1.67]  | 148,379 | 214 | 1.44  | [1.26, 1.65]  |
|                                      | Non-chemical                | 17,922  | 27  | 1.51 | [0.99, 2.19]  | 17,855  | 24  | 1.34  | [0.86, 2.00]  |
| <b>Femoral bonegraft</b>             | No                          | 165,859 | 243 | 1.47 | [1.29, 1.66]  | 165,290 | 238 | 1.44  | [1.26, 1.63]  |
|                                      | Yes                         | 950     | 2   | 2.11 | [0.26, 7.61]  | 945     | 0   |       |               |
| <b>Tibial bonegraft</b>              | No                          | 166,136 | 242 | 1.46 | [1.28, 1.65]  | 165,567 | 237 | 1.43  | [1.25, 1.63]  |
|                                      | Yes                         | 672     | 3   | 4.46 | [0.92, 13.04] | 667     | 1   | 1.50  | [0.04, 8.35]  |
| <b>Intraoperative event</b>          | No                          | 165,848 | 242 | 1.46 | [1.28, 1.66]  | 165,279 | 238 | 1.44  | [1.26, 1.64]  |
|                                      | Yes                         | 960     | 3   | 3.12 | [0.64, 9.13]  | 956     | 0   |       |               |
| <b>Health system characteristics</b> |                             |         |     |      |               |         |     |       |               |
| <b>Place of surgery</b>              | England                     | 156,941 | 229 | 1.46 | [1.28, 1.66]  | 156,406 | 227 | 1.45  | [1.27, 1.65]  |
|                                      | Wales                       | 9,868   | 16  | 1.62 | [0.93, 2.63]  | 9,828   | 11  | 1.12  | [0.56, 2.00]  |
|                                      | NHS                         | 141,117 | 203 | 1.44 | [1.25, 1.65]  | 140,641 | 196 | 1.39  | [1.21, 1.60]  |
| <b>Funding</b>                       | Private                     | 18,558  | 32  | 1.72 | [1.18, 2.43]  | 18,492  | 34  | 1.84  | [1.27, 2.57]  |
|                                      | Unspecified                 | 7,133   | 10  | 1.40 | [0.67, 2.58]  | 7,102   | 8   | 1.13  | [0.49, 2.22]  |
| <b>Grade operating surgeon</b>       | Consultant                  | 140,636 | 212 | 1.51 | [1.31, 1.72]  | 140,155 | 190 | 1.36  | [1.17, 1.56]  |
|                                      | Other                       | 26,172  | 33  | 1.26 | [0.87, 1.77]  | 26,079  | 48  | 1.84  | [1.36, 2.44]  |
| <b>Consultant involvement</b>        | Operating                   | 140,636 | 212 | 1.51 | [1.31, 1.72]  | 140,155 | 190 | 1.36  | [1.17, 1.56]  |
|                                      | Assisting                   | 9,414   | 16  | 1.70 | [0.97, 2.76]  | 9,379   | 19  | 2.03  | [1.22, 3.16]  |
|                                      | Not involved                | 16,758  | 17  | 1.01 | [0.59, 1.62]  | 16,701  | 29  | 1.74  | [1.16, 2.49]  |
| <b>Total volume</b>                  | ≤25                         | 42,558  | 54  | 1.27 | [0.95, 1.66]  | 42,399  | 62  | 1.46  | [1.12, 1.87]  |

|                          |           |        |    |      |              |        |    |      |              |
|--------------------------|-----------|--------|----|------|--------------|--------|----|------|--------------|
| <b>Operating surgeon</b> | ]25-50]   | 39,316 | 61 | 1.55 | [1.19, 1.99] | 39,168 | 67 | 1.71 | [1.33, 2.17] |
|                          | ]50-85]   | 41,807 | 62 | 1.48 | [1.14, 1.90] | 41,673 | 52 | 1.25 | [0.93, 1.64] |
|                          | >85       | 43,127 | 68 | 1.58 | [1.22, 2.00] | 42,994 | 57 | 1.33 | [1.00, 1.72] |
| <b>Total volume</b>      | ≤38       | 42,533 | 54 | 1.27 | [0.95, 1.66] | 42,370 | 62 | 1.46 | [1.12, 1.88] |
| <b>Surgeon in charge</b> | ]38-70]   | 42,792 | 69 | 1.61 | [1.25, 2.04] | 42,648 | 65 | 1.52 | [1.18, 1.94] |
|                          | ]70-110]  | 39,847 | 56 | 1.41 | [1.06, 1.83] | 39,711 | 57 | 1.44 | [1.09, 1.86] |
|                          | >110      | 41,637 | 66 | 1.59 | [1.23, 2.02] | 41,507 | 54 | 1.30 | [0.98, 1.70] |
| <b>Total volume</b>      | ≤150      | 41,248 | 46 | 1.12 | [0.82, 1.49] | 41,090 | 60 | 1.46 | [1.11, 1.88] |
| <b>Hospital</b>          | ]150-285] | 42,819 | 57 | 1.33 | [1.01, 1.72] | 42,674 | 61 | 1.43 | [1.09, 1.84] |
|                          | ]285-440] | 41,704 | 61 | 1.46 | [1.12, 1.88] | 41,564 | 60 | 1.44 | [1.10, 1.86] |
|                          | >440      | 41,037 | 81 | 1.97 | [1.57, 2.45] | 40,907 | 57 | 1.39 | [1.06, 1.81] |

(continues on next page)

|                                                |                   | 6-12 months  |       |                        |                    | 1-2 years    |       |           |              | > 2 years    |       |           |              |
|------------------------------------------------|-------------------|--------------|-------|------------------------|--------------------|--------------|-------|-----------|--------------|--------------|-------|-----------|--------------|
|                                                |                   | Person-years | Cases | Incidence <sup>1</sup> | 95%CI <sup>2</sup> | Person-years | Cases | Incidence | 95%CI        | Person-years | Cases | Incidence | 95%CI        |
| <b>Patient characteristics</b>                 |                   |              |       |                        |                    |              |       |           |              |              |       |           |              |
| <b>Sex</b>                                     | Female            | 193,444      | 238   | 1.23                   | [1.08, 1.40]       | 353,962      | 407   | 1.15      | [1.04, 1.27] | 1,176,966    | 737   | 0.63      | [0.58, 0.67] |
|                                                | Male              | 146,168      | 390   | 2.67                   | [2.41, 2.95]       | 265,874      | 563   | 2.12      | [1.95, 2.30] | 862,836      | 841   | 0.97      | [0.91, 1.04] |
| <b>Age</b>                                     | <60               | 54,735       | 126   | 2.30                   | [1.92, 2.74]       | 99,675       | 193   | 1.94      | [1.67, 2.23] | 329,079      | 387   | 1.18      | [1.06, 1.30] |
|                                                | [60-69]           | 115,136      | 235   | 2.04                   | [1.79, 2.32]       | 210,567      | 367   | 1.74      | [1.57, 1.93] | 705,360      | 590   | 0.84      | [0.77, 0.91] |
|                                                | [70-79]           | 123,820      | 207   | 1.67                   | [1.45, 1.92]       | 226,692      | 335   | 1.48      | [1.32, 1.64] | 761,517      | 511   | 0.67      | [0.61, 0.73] |
|                                                | ≥80               | 45,921       | 60    | 1.31                   | [1.00, 1.68]       | 82,903       | 75    | 0.90      | [0.71, 1.13] | 243,846      | 90    | 0.37      | [0.30, 0.45] |
| <b>Ethnicity</b>                               | White             | 257,636      | 530   | 2.06                   | [1.89, 2.24]       | 468,868      | 816   | 1.74      | [1.62, 1.86] | 1,512,063    | 1,338 | 0.88      | [0.84, 0.93] |
|                                                | Black Afr. origin | 3,007        | 8     | 2.66                   | [1.15, 5.24]       | 5,430        | 15    | 2.76      | [1.55, 4.56] | 15,833       | 22    | 1.39      | [0.87, 2.10] |
|                                                | South Asian       | 7,771        | 16    | 2.06                   | [1.18, 3.34]       | 13,954       | 29    | 2.08      | [1.39, 2.98] | 40,166       | 32    | 0.80      | [0.54, 1.12] |
|                                                | Other and mixed   | 3,266        | 10    | 3.06                   | [1.47, 5.63]       | 5,835        | 11    | 1.89      | [0.94, 3.37] | 16,115       | 14    | 0.87      | [0.47, 1.46] |
|                                                | Unclear           | 7,117        | 6     | 0.84                   | [0.31, 1.83]       | 12,882       | 7     | 0.54      | [0.22, 1.12] | 44,912       | 14    | 0.31      | [0.17, 0.52] |
| <b>BMI<sup>3</sup></b>                         | <25               | 20,097       | 42    | 2.09                   | [1.51, 2.82]       | 35,784       | 54    | 1.51      | [1.13, 1.97] | 91,779       | 90    | 0.98      | [0.79, 1.21] |
|                                                | [25-29.9]         | 65,836       | 140   | 2.13                   | [1.79, 2.51]       | 117,325      | 230   | 1.96      | [1.72, 2.23] | 300,783      | 358   | 1.19      | [1.07, 1.32] |
|                                                | ≥30               | 102,817      | 253   | 2.46                   | [2.17, 2.78]       | 182,678      | 416   | 2.28      | [2.06, 2.51] | 453,822      | 689   | 1.52      | [1.41, 1.64] |
|                                                | Missing           | 150,863      | 193   | 1.28                   | [1.11, 1.47]       | 284,050      | 270   | 0.95      | [0.84, 1.07] | 1,193,420    | 441   | 0.37      | [0.34, 0.41] |
| <b>ASA grade<sup>4</sup></b>                   | 1                 | 46,400       | 80    | 1.72                   | [1.37, 2.15]       | 86,396       | 125   | 1.45      | [1.20, 1.72] | 344,808      | 231   | 0.67      | [0.59, 0.76] |
|                                                | 2                 | 242,929      | 415   | 1.71                   | [1.55, 1.88]       | 443,071      | 647   | 1.46      | [1.35, 1.58] | 1,423,526    | 1,072 | 0.75      | [0.71, 0.80] |
|                                                | 3-5               | 50,283       | 133   | 2.65                   | [2.21, 3.13]       | 90,370       | 198   | 2.19      | [1.90, 2.52] | 271,469      | 275   | 1.01      | [0.90, 1.14] |
| <b>Chronic Pulmonary Disease</b>               | No                | 239,556      | 490   | 2.05                   | [1.87, 2.23]       | 437,171      | 744   | 1.70      | [1.58, 1.83] | 1,438,806    | 1,251 | 0.87      | [0.82, 0.92] |
|                                                | Yes               | 39,242       | 80    | 2.04                   | [1.62, 2.54]       | 69,798       | 134   | 1.92      | [1.61, 2.27] | 190,284      | 169   | 0.89      | [0.76, 1.03] |
| <b>Diabetes</b>                                | No                | 245,476      | 483   | 1.97                   | [1.80, 2.15]       | 447,554      | 721   | 1.61      | [1.50, 1.73] | 1,464,747    | 1,252 | 0.85      | [0.81, 0.90] |
|                                                | Yes               | 33,323       | 87    | 2.61                   | [2.09, 3.22]       | 59,415       | 157   | 2.64      | [2.25, 3.09] | 164,343      | 168   | 1.02      | [0.87, 1.19] |
| <b>Dementia</b>                                | No                | 278,011      | 570   | 2.05                   | [1.89, 2.23]       | 505,634      | 875   | 1.73      | [1.62, 1.85] | 1,626,384    | 1,419 | 0.87      | [0.83, 0.92] |
|                                                | Yes               | 788          | 0     |                        |                    | 1,335        | 3     | 2.25      | [0.46, 6.56] | 2,706        | 1     | 0.37      | [0.01, 2.06] |
| <b>Liver Disease</b>                           | No                | 276,811      | 561   | 2.03                   | [1.86, 2.20]       | 503,551      | 865   | 1.72      | [1.61, 1.84] | 1,621,056    | 1,402 | 0.86      | [0.82, 0.91] |
|                                                | Yes               | 1,987        | 9     | 4.53                   | [2.07, 8.60]       | 3,418        | 13    | 3.80      | [2.03, 6.50] | 8,033        | 18    | 2.24      | [1.33, 3.54] |
| <b>Congestive Heart Failure</b>                | No                | 273,603      | 555   | 2.03                   | [1.86, 2.20]       | 497,788      | 860   | 1.73      | [1.61, 1.85] | 1,604,257    | 1,397 | 0.87      | [0.83, 0.92] |
|                                                | Yes               | 5,195        | 15    | 2.89                   | [1.62, 4.76]       | 9,181        | 18    | 1.96      | [1.16, 3.10] | 24,832       | 23    | 0.93      | [0.59, 1.39] |
| <b>Connective Tissue-Rheumatologic Disease</b> | No                | 263,404      | 536   | 2.03                   | [1.87, 2.21]       | 479,292      | 822   | 1.72      | [1.60, 1.84] | 1,546,446    | 1,325 | 0.86      | [0.81, 0.90] |
|                                                | Yes               | 15,394       | 34    | 2.21                   | [1.53, 3.09]       | 27,677       | 56    | 2.02      | [1.53, 2.63] | 82,643       | 95    | 1.15      | [0.93, 1.41] |
| <b>Cancer</b>                                  | No                | 267,512      | 549   | 2.05                   | [1.88, 2.23]       | 487,052      | 849   | 1.74      | [1.63, 1.86] | 1,574,000    | 1,375 | 0.87      | [0.83, 0.92] |
|                                                | Cancer            | 10,071       | 19    | 1.89                   | [1.14, 2.95]       | 17,855       | 25    | 1.40      | [0.91, 2.07] | 49,965       | 39    | 0.78      | [0.56, 1.07] |
|                                                | Metastatic        | 1,215        | 2     | 1.65                   | [0.20, 5.94]       | 2,062        | 4     | 1.94      | [0.53, 4.97] | 5,125        | 6     | 1.17      | [0.43, 2.55] |
| <b>Cerebrovascular Disease</b>                 | No                | 273,236      | 556   | 2.03                   | [1.87, 2.21]       | 497,129      | 864   | 1.74      | [1.62, 1.86] | 1,602,355    | 1,401 | 0.87      | [0.83, 0.92] |
|                                                | Yes               | 5,562        | 14    | 2.52                   | [1.38, 4.22]       | 9,840        | 14    | 1.42      | [0.78, 2.39] | 26,734       | 19    | 0.71      | [0.43, 1.11] |
| <b>Myocardial Infarction</b>                   | No                | 271,158      | 551   | 2.03                   | [1.87, 2.21]       | 493,696      | 845   | 1.71      | [1.60, 1.83] | 1,588,443    | 1,386 | 0.87      | [0.83, 0.92] |
|                                                | Yes               | 7,640        | 19    | 2.49                   | [1.50, 3.88]       | 13,273       | 33    | 2.49      | [1.71, 3.49] | 40,647       | 34    | 0.84      | [0.58, 1.17] |
| <b>Paraplegia and Hemiplegia</b>               | No                | 277,718      | 566   | 2.04                   | [1.87, 2.21]       | 505,031      | 875   | 1.73      | [1.62, 1.85] | 1,623,574    | 1,413 | 0.87      | [0.83, 0.92] |
|                                                | Yes               | 1,080        | 4     | 3.70                   | [1.01, 9.48]       | 1,938        | 3     | 1.55      | [0.32, 4.52] | 5,516        | 7     | 1.27      | [0.51, 2.61] |
| <b>Peptic Ulcer Disease</b>                    | No                | 274,652      | 562   | 2.05                   | [1.88, 2.22]       | 499,491      | 860   | 1.72      | [1.61, 1.84] | 1,605,637    | 1,403 | 0.87      | [0.83, 0.92] |
|                                                | Yes               | 4,146        | 8     | 1.93                   | [0.83, 3.80]       | 7,478        | 18    | 2.41      | [1.43, 3.80] | 23,452       | 17    | 0.72      | [0.42, 1.16] |
| <b>Peripheral Vascular Disease</b>             | No                | 273,715      | 557   | 2.03                   | [1.87, 2.21]       | 498,001      | 853   | 1.71      | [1.60, 1.83] | 1,605,426    | 1,395 | 0.87      | [0.82, 0.92] |
|                                                | Yes               | 5,084        | 13    | 2.56                   | [1.36, 4.37]       | 8,968        | 25    | 2.79      | [1.80, 4.12] | 23,664       | 25    | 1.06      | [0.68, 1.56] |
| <b>Renal Disease</b>                           | No                | 270,075      | 551   | 2.04                   | [1.87, 2.22]       | 492,382      | 848   | 1.72      | [1.61, 1.84] | 1,601,617    | 1,401 | 0.87      | [0.83, 0.92] |
|                                                | Yes               | 8,723        | 19    | 2.18                   | [1.31, 3.40]       | 14,587       | 30    | 2.06      | [1.39, 2.94] | 27,473       | 19    | 0.69      | [0.42, 1.08] |
| <b>Surgical characteristics</b>                |                   |              |       |                        |                    |              |       |           |              |              |       |           |              |
| <b>Osteoarthritis</b>                          | No                | 9,209        | 29    | 3.15                   | [2.11, 4.52]       | 16,806       | 35    | 2.08      | [1.45, 2.90] | 57,293       | 72    | 1.26      | [0.98, 1.58] |
|                                                | Yes               | 330,404      | 599   | 1.81                   | [1.67, 1.96]       | 603,031      | 935   | 1.55      | [1.45, 1.65] | 1,982,510    | 1,506 | 0.76      | [0.72, 0.80] |
| <b>Trauma</b>                                  | No                | 337,723      | 619   | 1.83                   | [1.69, 1.98]       | 616,451      | 957   | 1.55      | [1.46, 1.65] | 2,028,556    | 1,558 | 0.77      | [0.73, 0.81] |
|                                                | Yes               | 1,889        | 9     | 4.76                   | [2.18, 9.04]       | 3,386        | 13    | 3.84      | [2.04, 6.57] | 11,247       | 20    | 1.78      | [1.09, 2.75] |
| <b>Previous knee</b>                           | No                | 339,371      | 627   | 1.85                   | [1.71, 2.00]       | 619,404      | 966   | 1.56      | [1.46, 1.66] | 2,038,407    | 1,571 | 0.77      | [0.73, 0.81] |



|                                       |                             |         |     |      |               |         |     |      |               |           |       |      |               |
|---------------------------------------|-----------------------------|---------|-----|------|---------------|---------|-----|------|---------------|-----------|-------|------|---------------|
| <b>infection</b>                      | Yes                         | 242     | 1   | 4.14 | [0.10, 23.07] | 432     | 4   | 9.26 | [2.52, 23.70] | 1,396     | 7     | 5.02 | [2.02, 10.33] |
| <b>Avascular necrosis</b>             | No                          | 338,372 | 621 | 1.84 | [1.69, 1.99]  | 617,579 | 965 | 1.56 | [1.47, 1.66]  | 2,032,128 | 1,572 | 0.77 | [0.74, 0.81]  |
|                                       | Yes                         | 1,240   | 7   | 5.64 | [2.27, 11.63] | 2,257   | 5   | 2.22 | [0.72, 5.17]  | 7,675     | 6     | 0.78 | [0.29, 1.70]  |
| <b>Inflammatory arthropathy</b>       | No                          | 331,843 | 611 | 1.84 | [1.70, 1.99]  | 605,571 | 943 | 1.56 | [1.46, 1.66]  | 1,988,385 | 1,516 | 0.76 | [0.72, 0.80]  |
|                                       | Yes                         | 7,769   | 17  | 2.19 | [1.27, 3.50]  | 14,266  | 27  | 1.89 | [1.25, 2.75]  | 51,418    | 62    | 1.21 | [0.92, 1.55]  |
| <b>Other indication</b>               | No                          | 337,780 | 626 | 1.85 | [1.71, 2.00]  | 616,555 | 964 | 1.56 | [1.47, 1.67]  | 2,031,545 | 1,566 | 0.77 | [0.73, 0.81]  |
|                                       | Yes                         | 1,832   | 2   | 1.09 | [0.13, 3.94]  | 3,281   | 6   | 1.83 | [0.67, 3.98]  | 8,258     | 12    | 1.45 | [0.75, 2.54]  |
| <b>Surgical approach</b>              | Medial parapatellar         | 315,065 | 589 | 1.87 | [1.72, 2.03]  | 575,016 | 906 | 1.58 | [1.47, 1.68]  | 1,894,810 | 1,484 | 0.78 | [0.74, 0.82]  |
|                                       | Mid Vastus                  | 9,718   | 8   | 0.82 | [0.36, 1.62]  | 17,676  | 24  | 1.36 | [0.87, 2.02]  | 52,952    | 33    | 0.62 | [0.43, 0.88]  |
|                                       | Lateral parapatellar        | 3,962   | 9   | 2.27 | [1.04, 4.31]  | 7,278   | 9   | 1.24 | [0.57, 2.35]  | 27,357    | 14    | 0.51 | [0.28, 0.86]  |
|                                       | Sub Vastus                  | 4,698   | 11  | 2.34 | [1.17, 4.19]  | 8,608   | 13  | 1.51 | [0.80, 2.58]  | 31,011    | 19    | 0.61 | [0.37, 0.96]  |
|                                       | Other approach              | 6,169   | 11  | 1.78 | [0.89, 3.19]  | 11,259  | 18  | 1.60 | [0.95, 2.53]  | 33,673    | 28    | 0.83 | [0.55, 1.20]  |
| <b>Procedure<sup>5</sup></b>          | Prim TKR cemented           | 285,001 | 565 | 1.98 | [1.82, 2.15]  | 518,791 | 861 | 1.66 | [1.55, 1.77]  | 1,677,744 | 1,388 | 0.83 | [0.78, 0.87]  |
|                                       | Prim TKR uncemented         | 16,862  | 21  | 1.25 | [0.77, 1.90]  | 31,812  | 45  | 1.41 | [1.03, 1.89]  | 123,415   | 58    | 0.47 | [0.36, 0.61]  |
|                                       | Prim TKR other              | 3,846   | 10  | 2.60 | [1.25, 4.78]  | 7,306   | 15  | 2.05 | [1.15, 3.39]  | 33,562    | 23    | 0.69 | [0.43, 1.03]  |
|                                       | Unicondylar                 | 29,437  | 28  | 0.95 | [0.63, 1.37]  | 53,765  | 47  | 0.87 | [0.64, 1.16]  | 179,783   | 100   | 0.56 | [0.45, 0.68]  |
|                                       | Patellofemoral              | 4,466   | 4   | 0.90 | [0.24, 2.29]  | 8,162   | 2   | 0.25 | [0.03, 0.89]  | 25,299    | 9     | 0.36 | [0.16, 0.68]  |
| <b>Constraint</b>                     | Unconstrained Fixed         | 198,807 | 351 | 1.77 | [1.59, 1.96]  | 361,390 | 539 | 1.49 | [1.37, 1.62]  | 1,163,663 | 842   | 0.72 | [0.68, 0.77]  |
|                                       | Unconstrained Mobile        | 23,772  | 41  | 1.72 | [1.24, 2.34]  | 44,716  | 75  | 1.68 | [1.32, 2.10]  | 171,079   | 123   | 0.72 | [0.60, 0.86]  |
|                                       | Posterior Stabilised Fixed  | 72,455  | 177 | 2.44 | [2.10, 2.83]  | 132,236 | 255 | 1.93 | [1.70, 2.18]  | 430,018   | 425   | 0.99 | [0.90, 1.09]  |
|                                       | Posterior Stabilised Mobile | 4,869   | 9   | 1.85 | [0.85, 3.51]  | 8,999   | 12  | 1.33 | [0.69, 2.33]  | 32,421    | 27    | 0.83 | [0.55, 1.21]  |
|                                       | Constrained Condylar        | 1,454   | 7   | 4.82 | [1.94, 9.92]  | 2,433   | 13  | 5.34 | [2.85, 9.14]  | 6,170     | 16    | 2.59 | [1.48, 4.21]  |
|                                       | Fixed                       | 8,367   | 12  | 1.43 | [0.74, 2.51]  | 14,882  | 14  | 0.94 | [0.51, 1.58]  | 43,510    | 26    | 0.60 | [0.39, 0.88]  |
|                                       | Mobile                      | 20,627  | 15  | 0.73 | [0.41, 1.20]  | 38,056  | 32  | 0.84 | [0.58, 1.19]  | 133,124   | 74    | 0.56 | [0.44, 0.70]  |
|                                       | Undetermined                | 9,262   | 16  | 1.73 | [0.99, 2.81]  | 17,124  | 30  | 1.75 | [1.18, 2.50]  | 59,819    | 45    | 0.75 | [0.55, 1.01]  |
| <b>General Anaesthesia</b>            | No                          | 190,641 | 337 | 1.77 | [1.58, 1.97]  | 344,669 | 518 | 1.50 | [1.38, 1.64]  | 1,066,226 | 773   | 0.72 | [0.67, 0.78]  |
|                                       | Yes                         | 148,971 | 291 | 1.95 | [1.74, 2.19]  | 275,168 | 452 | 1.64 | [1.49, 1.80]  | 973,577   | 805   | 0.83 | [0.77, 0.89]  |
| <b>Nerve Block Anaesthesia</b>        | No                          | 273,948 | 506 | 1.85 | [1.69, 2.02]  | 496,637 | 776 | 1.56 | [1.45, 1.68]  | 1,605,131 | 1,246 | 0.78 | [0.73, 0.82]  |
|                                       | Yes                         | 65,664  | 122 | 1.86 | [1.54, 2.22]  | 123,200 | 194 | 1.57 | [1.36, 1.81]  | 434,672   | 332   | 0.76 | [0.68, 0.85]  |
| <b>Epidural Anaesthesia</b>           | No                          | 310,936 | 585 | 1.88 | [1.73, 2.04]  | 565,745 | 881 | 1.56 | [1.46, 1.66]  | 1,805,464 | 1,395 | 0.77 | [0.73, 0.81]  |
|                                       | Yes                         | 28,676  | 43  | 1.50 | [1.09, 2.02]  | 54,092  | 89  | 1.65 | [1.32, 2.02]  | 234,339   | 183   | 0.78 | [0.67, 0.90]  |
| <b>Spinal Anaesthesia</b>             | No                          | 141,553 | 280 | 1.98 | [1.75, 2.22]  | 262,560 | 435 | 1.66 | [1.50, 1.82]  | 956,468   | 799   | 0.84 | [0.78, 0.90]  |
|                                       | Yes                         | 198,059 | 348 | 1.76 | [1.58, 1.95]  | 357,277 | 535 | 1.50 | [1.37, 1.63]  | 1,083,335 | 779   | 0.72 | [0.67, 0.77]  |
| <b>Thromboprophylaxis regimen</b>     | Chemical                    | 303,177 | 563 | 1.86 | [1.71, 2.02]  | 550,163 | 869 | 1.58 | [1.48, 1.69]  | 1,719,831 | 1,340 | 0.78 | [0.74, 0.82]  |
|                                       | Non-chemical                | 36,435  | 65  | 1.78 | [1.38, 2.27]  | 69,673  | 101 | 1.45 | [1.18, 1.76]  | 319,972   | 238   | 0.74 | [0.65, 0.84]  |
| <b>Femoral bonegraft</b>              | No                          | 337,685 | 625 | 1.85 | [1.71, 2.00]  | 616,486 | 961 | 1.56 | [1.46, 1.66]  | 2,032,605 | 1,568 | 0.77 | [0.73, 0.81]  |
|                                       | Yes                         | 1,927   | 3   | 1.56 | [0.32, 4.55]  | 3,350   | 9   | 2.69 | [1.23, 5.10]  | 7,198     | 10    | 1.39 | [0.67, 2.56]  |
| <b>Tibial bonegraft</b>               | No                          | 338,250 | 624 | 1.84 | [1.70, 2.00]  | 617,363 | 957 | 1.55 | [1.45, 1.65]  | 2,031,865 | 1,569 | 0.77 | [0.73, 0.81]  |
|                                       | Yes                         | 1,362   | 4   | 2.94 | [0.80, 7.52]  | 2,473   | 13  | 5.26 | [2.80, 8.99]  | 7,938     | 9     | 1.13 | [0.52, 2.15]  |
| <b>Intraoperative event</b>           | No                          | 337,664 | 624 | 1.85 | [1.71, 2.00]  | 616,265 | 962 | 1.56 | [1.46, 1.66]  | 2,029,445 | 1,570 | 0.77 | [0.74, 0.81]  |
|                                       | Yes                         | 1,949   | 4   | 2.05 | [0.56, 5.26]  | 3,571   | 8   | 2.24 | [0.97, 4.41]  | 10,358    | 8     | 0.77 | [0.33, 1.52]  |
| <b>Health system characteristics</b>  |                             |         |     |      |               |         |     |      |               |           |       |      |               |
| <b>Place of surgery</b>               | England                     | 319,530 | 602 | 1.88 | [1.74, 2.04]  | 582,849 | 920 | 1.58 | [1.48, 1.68]  | 1,920,284 | 1,483 | 0.77 | [0.73, 0.81]  |
|                                       | Wales                       | 20,083  | 26  | 1.29 | [0.85, 1.90]  | 36,987  | 50  | 1.35 | [1.00, 1.78]  | 119,519   | 95    | 0.79 | [0.64, 0.97]  |
| <b>Funding</b>                        | NHS                         | 287,368 | 527 | 1.83 | [1.68, 2.00]  | 521,939 | 844 | 1.62 | [1.51, 1.73]  | 1,630,947 | 1,321 | 0.81 | [0.77, 0.85]  |
|                                       | Private                     | 37,755  | 75  | 1.99 | [1.56, 2.49]  | 69,767  | 81  | 1.16 | [0.92, 1.44]  | 250,943   | 140   | 0.56 | [0.47, 0.66]  |
|                                       | Unspecified                 | 14,489  | 26  | 1.79 | [1.17, 2.63]  | 28,130  | 45  | 1.60 | [1.17, 2.14]  | 157,913   | 117   | 0.74 | [0.61, 0.89]  |
| <b>Grade operating surgeon</b>        | Consultant                  | 286,344 | 531 | 1.85 | [1.70, 2.02]  | 521,237 | 794 | 1.52 | [1.42, 1.63]  | 1,679,564 | 1,305 | 0.78 | [0.74, 0.82]  |
|                                       | Other                       | 53,268  | 97  | 1.82 | [1.48, 2.22]  | 98,599  | 176 | 1.79 | [1.53, 2.07]  | 360,239   | 273   | 0.76 | [0.67, 0.85]  |
| <b>Consultant involvement</b>         | Operating                   | 286,344 | 531 | 1.85 | [1.70, 2.02]  | 521,237 | 794 | 1.52 | [1.42, 1.63]  | 1,679,564 | 1,305 | 0.78 | [0.74, 0.82]  |
|                                       | Assisting                   | 19,152  | 32  | 1.67 | [1.14, 2.36]  | 34,909  | 61  | 1.75 | [1.34, 2.24]  | 115,900   | 95    | 0.82 | [0.66, 1.00]  |
|                                       | Not involved                | 34,116  | 65  | 1.91 | [1.47, 2.43]  | 63,690  | 115 | 1.81 | [1.49, 2.17]  | 244,338   | 178   | 0.73 | [0.63, 0.84]  |
| <b>Total volume Operating surgeon</b> | <25                         | 86,598  | 171 | 1.97 | [1.69, 2.29]  | 161,050 | 287 | 1.78 | [1.58, 2.00]  | 656,089   | 517   | 0.79 | [0.72, 0.86]  |
|                                       | ]25-50]                     | 79,993  | 128 | 1.60 | [1.33, 1.90]  | 146,990 | 264 | 1.80 | [1.59, 2.03]  | 510,422   | 463   | 0.91 | [0.83, 0.99]  |
|                                       | ]50-85]                     | 85,162  | 166 | 1.95 | [1.66, 2.27]  | 154,650 | 215 | 1.39 | [1.21, 1.59]  | 464,846   | 321   | 0.69 | [0.62, 0.77]  |

|                          |           |        |     |      |              |         |     |      |              |         |     |      |              |
|--------------------------|-----------|--------|-----|------|--------------|---------|-----|------|--------------|---------|-----|------|--------------|
|                          | >85       | 87,858 | 163 | 1.86 | [1.58, 2.16] | 157,145 | 204 | 1.30 | [1.13, 1.49] | 408,446 | 277 | 0.68 | [0.60, 0.76] |
| <b>Total volume</b>      | ≤38       | 86,541 | 165 | 1.91 | [1.63, 2.22] | 161,902 | 287 | 1.77 | [1.57, 1.99] | 677,393 | 545 | 0.80 | [0.74, 0.88] |
| <b>Surgeon in charge</b> | ]38-70]   | 87,111 | 150 | 1.72 | [1.46, 2.02] | 159,352 | 243 | 1.52 | [1.34, 1.73] | 540,914 | 459 | 0.85 | [0.77, 0.93] |
|                          | ]70-110]  | 81,140 | 154 | 1.90 | [1.61, 2.22] | 146,942 | 231 | 1.57 | [1.38, 1.79] | 423,165 | 293 | 0.69 | [0.62, 0.78] |
|                          | >110      | 84,820 | 159 | 1.87 | [1.59, 2.19] | 151,641 | 209 | 1.38 | [1.20, 1.58] | 398,331 | 281 | 0.71 | [0.63, 0.79] |
| <b>Total volume</b>      | ≤150      | 83,910 | 155 | 1.85 | [1.57, 2.16] | 157,634 | 222 | 1.41 | [1.23, 1.61] | 684,970 | 501 | 0.73 | [0.67, 0.80] |
| <b>Hospital</b>          | ]150-285] | 87,194 | 155 | 1.78 | [1.51, 2.08] | 159,839 | 268 | 1.68 | [1.48, 1.89] | 530,588 | 432 | 0.81 | [0.74, 0.89] |
|                          | ]285-440] | 84,916 | 160 | 1.88 | [1.60, 2.20] | 151,101 | 261 | 1.73 | [1.52, 1.95] | 423,818 | 351 | 0.83 | [0.74, 0.92] |
|                          | >440      | 83,592 | 158 | 1.89 | [1.61, 2.21] | 151,263 | 219 | 1.45 | [1.26, 1.65] | 400,427 | 294 | 0.73 | [0.65, 0.82] |

1. Incidence rate per 1,000 person-years
2. 95% CI: 95% confidence interval
3. BMI: Body Mass Index (kg/m<sup>2</sup>)
4. ASA: American Society of Anaesthesiologists grade.
5. TKR: Total Knee Replacement

\*Information on ethnicity and comorbidities are only available on the 557,426 patients operated in England with a HES record, no record in PEDW and no evidence of residency outside England. See figure 1 and Appendix 2 page 2 for more details.

**Appendix Table 2: Incidence rate ratios of revision for PJI and 95% confidence intervals for patient characteristics**

|                             |                      | Total  |             |         | ≤3mths       |      |             |         | 3–6mths      |      |             |         | 6–12mths     |      |             |         | 12–24mths    |             |             |         | ≥24mths      |             |             |         |              |
|-----------------------------|----------------------|--------|-------------|---------|--------------|------|-------------|---------|--------------|------|-------------|---------|--------------|------|-------------|---------|--------------|-------------|-------------|---------|--------------|-------------|-------------|---------|--------------|
|                             |                      | RR     | 95%CI       | P-value | Adj. p-value | RR   | 95%CI       | P-value | Adj. p-value | RR   | 95%CI       | P-value | Adj. p-value | RR   | 95%CI       | P-value | Adj. p-value | RR          | 95%CI       | P-value | Adj. p-value | RR          | 95%CI       | P-value | Adj. p-value |
| Sex                         | Male                 | 1.83   | [1.71-1.96] | <0.0001 | <0.0001      | 2.37 | [1.81-3.06] | <0.0001 | <0.0001      | 2.17 | [1.65-2.81] | <0.0001 | <0.0001      | 2.19 | [1.86-2.57] | <0.0001 | <0.0001      | 1.85        | [1.62-2.09] | <0.0001 | <0.0001      | 1.57        | [1.42-1.74] | <0.0001 | <0.0001      |
|                             | Female               | Ref    |             |         |              | Ref  |             |         |              | Ref  |             |         |              | Ref  |             |         |              | Ref         |             |         |              | Ref         |             |         |              |
| DIC                         |                      | 53,378 |             |         | 61,493       |      |             |         |              |      |             |         |              |      |             |         |              |             |             |         |              |             |             |         |              |
| Age                         | ≥80                  | 0.50   | [0.43-0.57] | <0.0001 | <0.0001      | 1.85 | [1.14-2.85] | 0.01    | 0.05         | 0.64 | [0.38-0.99] | 0.05    | 0.16         | 0.57 | [0.40-0.77] | <0.0001 | <0.0001      | 0.48        | [0.36-0.62] | <0.0001 | <0.0001      | 0.32        | [0.25-0.40] | <0.0001 | <0.0001      |
|                             | [70–79]              | 0.65   | [0.60-0.72] | <0.0001 | <0.0001      | 1.11 | [0.73-1.63] | 0.69    | 0.87         | 0.70 | [0.49-0.98] | 0.04    | 0.14         | 0.71 | [0.56-0.88] | <0.0001 | 0.01         | 0.75        | [0.62-0.89] | <0.0001 | 0.01         | 0.56        | [0.49-0.64] | <0.0001 | <0.0001      |
|                             | [60–69]              | 0.76   | [0.69-0.83] | <0.0001 | <0.0001      | 1.09 | [0.72-1.59] | 0.76    | 0.90         | 0.61 | [0.42-0.86] | 0.01    | 0.03         | 0.85 | [0.68-1.05] | 0.13    | 0.31         | 0.87        | [0.73-1.03] | 0.10    | 0.26         | 0.69        | [0.60-0.78] | <0.0001 | <0.0001      |
| DIC                         |                      | 53,378 |             |         | 61,493       |      |             |         |              |      |             |         |              |      |             |         |              |             |             |         |              |             |             |         |              |
| Ethnicity                   | Black African origin | 1.67   | [1.24-2.17] | <0.0001 | <0.0001      | 1.70 | [0.35-4.20] | 0.58    | 0.79         | 2.05 | [0.55-4.60] | 0.28    | 0.54         | 1.47 | [0.63-2.69] | 0.38    | 0.63         | 1.79        | [0.99-2.82] | 0.06    | 0.17         | 1.64        | [1.02-2.41] | 0.03    | 0.12         |
|                             | Other and mixed      | 1.17   | [0.84-1.57] | 0.36    | 0.61         | 1.43 | [0.29-3.49] | 0.78    | 0.91         | 0.88 | [0.10-2.48] | 0.62    | 0.81         | 1.59 | [0.75-2.76] | 0.21    | 0.44         | 1.16        | [0.57-1.96] | 0.74    | 0.89         | 0.98        | [0.53-1.57] | 0.84    | 0.93         |
|                             | South Asian          | 1.17   | [0.93-1.43] | 0.17    | 0.38         | 1.51 | [0.59-2.90] | 0.41    | 0.65         | 1.89 | [0.88-3.30] | 0.09    | 0.23         | 1.14 | [0.64-1.78] | 0.72    | 0.88         | 1.33        | [0.88-1.88] | 0.18    | 0.39         | 0.91        | [0.61-1.26] | 0.54    | 0.75         |
|                             | Unclear White        | 0.35   | [0.23-0.48] | <0.0001 | <0.0001      | 0.20 | [0.01-0.76] | 0.02    | 0.07         | 0.39 | [0.05-1.09] | 0.13    | 0.31         | 0.39 | [0.14-0.77] | 0.02    | 0.07         | 0.31        | [0.12-0.58] | <0.0001 | 0.01         | 0.35        | [0.19-0.55] | <0.0001 | <0.0001      |
| DIC                         |                      | 46,938 |             |         | 54,314       |      |             |         |              |      |             |         |              |      |             |         |              |             |             |         |              |             |             |         |              |
| BMI <sup>1</sup>            | ≥30                  | 1.46   | [1.29-1.63] | <0.0001 | <0.0001      | 2.23 | [1.35-3.60] | 0.02    | 0.09         | 1.34 | [0.83-2.10] | 0.39    | 0.63         | 1.26 | [0.96-1.64] | 0.12    | 0.31         | 1.52        | [1.19-1.92] | <0.0001 | 0.02         | 1.46        | [1.22-1.73] | <0.0001 | <0.0001      |
|                             | [25–29.9]            | 1.30   | [1.15-1.46] | <0.0001 | <0.0001      | 1.64 | [0.96-2.67] | 0.25    | 0.49         | 1.54 | [0.94-2.42] | 0.19    | 0.41         | 1.11 | [0.84-1.46] | 0.53    | 0.75         | 1.39        | [1.08-1.77] | 0.02    | 0.07         | 1.27        | [1.05-1.53] | 0.02    | 0.09         |
| DIC                         |                      | 53,378 |             |         | 61,493       |      |             |         |              |      |             |         |              |      |             |         |              |             |             |         |              |             |             |         |              |
| ASA <sup>2</sup>            | 3–5                  | 1.84   | [1.63-2.07] | <0.0001 | <0.0001      | 1.85 | [1.11-2.95] | 0.02    | 0.08         | 1.89 | [1.13-3.00] | 0.02    | 0.07         | 1.80 | [1.34-2.39] | <0.0001 | <0.0001      | 1.71        | [1.35-2.15] | <0.0001 | <0.0001      | 1.76        | [1.46-2.11] | <0.0001 | <0.0001      |
|                             | 2                    | 1.23   | [1.12-1.36] | <0.0001 | <0.0001      | 1.25 | [0.81-1.89] | 0.36    | 0.61         | 1.29 | [0.85-1.93] | 0.27    | 0.53         | 1.11 | [0.87-1.41] | 0.43    | 0.67         | 1.11        | [0.91-1.34] | 0.33    | 0.59         | 1.27        | [1.10-1.47] | <0.0001 | 0.01         |
|                             | 1                    | Ref    |             |         |              | Ref  |             |         |              | Ref  |             |         |              | Ref  |             |         |              | Ref         |             |         |              | Ref         |             |         |              |
| DIC                         |                      | 53,378 |             |         | 61,493       |      |             |         |              |      |             |         |              |      |             |         |              |             |             |         |              |             |             |         |              |
| Chronic Pulmonary Disease   |                      | 1.17   | [1.05-1.29] | <0.0001 | 0.02         | 1.33 | [0.90-1.87] | 0.15    | 0.36         | 1.59 | [1.10-2.19] | 0.01    | 0.05         | 1.04 | [0.81-1.31] | 0.77    | 0.91         | 1.16        | [0.96-1.39] | 0.13    | 0.31         | 1.03        | [0.87-1.20] | 0.75    | 0.90         |
| DIC                         |                      | 47,073 |             |         | 54,367       |      |             |         |              |      |             |         |              |      |             |         |              |             |             |         |              |             |             |         |              |
| Diabetes                    |                      | 1.35   | [1.22-1.48] | <0.0001 | <0.0001      | 0.99 | [0.63-1.45] | 0.89    | 0.95         | 1.43 | [0.96-2.01] | 0.07    | 0.21         | 1.27 | [0.99-1.58] | 0.05    | 0.16         | 1.57        | [1.31-1.86] | <0.0001 | <0.0001      | 1.17        | [0.99-1.37] | 0.06    | 0.18         |
| DIC                         |                      | 47,049 |             |         | 54,343       |      |             |         |              |      |             |         |              |      |             |         |              |             |             |         |              |             |             |         |              |
| Dementia                    |                      | 1.35   | [0.58-2.43] | 0.52    | 0.74         | 3.02 | [0.36-8.52] | 0.30    | 0.56         | 3.39 | [0.40-9.51] | 0.25    | 0.49         |      |             |         | 1.51         | [0.31-3.64] | 0.72        | 0.88    | 0.54         | [0.01-1.99] | 0.35        | 0.61    |              |
| DIC                         |                      | 47,083 |             |         | 54,370       |      |             |         |              |      |             |         |              |      |             |         |              |             |             |         |              |             |             |         |              |
| Liver disease               |                      | 2.20   | [1.60-2.90] | <0.0001 | <0.0001      | 1.36 | [0.17-3.83] | 0.97    | 0.98         | 1.89 | [0.38-4.59] | 0.48    | 0.70         | 2.09 | [0.95-3.70] | 0.06    | 0.17         | 2.05        | [1.08-3.31] | 0.02    | 0.08         | 2.32        | [1.37-3.51] | <0.0001 | 0.01         |
| DIC                         |                      | 47,062 |             |         | 54,351       |      |             |         |              |      |             |         |              |      |             |         |              |             |             |         |              |             |             |         |              |
| Congestive Heart Failure    |                      | 1.34   | [1.05-1.68] | 0.02    | 0.07         | 2.23 | [1.04-3.90] | 0.03    | 0.10         | 1.21 | [0.38-2.51] | 0.86    | 0.94         | 1.42 | [0.79-2.25] | 0.23    | 0.47         | 1.15        | [0.68-1.75] | 0.63    | 0.82         | 1.16        | [0.73-1.69] | 0.56    | 0.77         |
| DIC                         |                      | 47,078 |             |         | 54,367       |      |             |         |              |      |             |         |              |      |             |         |              |             |             |         |              |             |             |         |              |
| Rheumatologic Disease       |                      | 1.47   | [1.27-1.68] | <0.0001 | <0.0001      | 2.15 | [1.26-3.31] | <0.0001 | 0.02         | 1.95 | [1.15-3.00] | 0.01    | 0.04         | 1.27 | [0.87-1.75] | 0.22    | 0.44         | 1.33        | [1.00-1.72] | 0.05    | 0.15         | 1.40        | [1.13-1.72] | <0.0001 | 0.01         |
| DIC                         |                      | 47,056 |             |         | 54,348       |      |             |         |              |      |             |         |              |      |             |         |              |             |             |         |              |             |             |         |              |
| Cancer                      | Cancer               | 0.90   | [0.73-1.10] | 0.30    | 0.56         | 0.70 | [0.25-1.39] | 0.31    | 0.56         | 0.76 | [0.27-1.49] | 0.39    | 0.63         | 0.90 | [0.54-1.36] | 0.58    | 0.79         | 0.80        | [0.52-1.16] | 0.25    | 0.49         | 0.96        | [0.68-1.30] | 0.76    | 0.91         |
|                             | Metastatic           | 1.64   | [0.95-2.50] | 0.06    | 0.18         | 2.40 | [0.29-6.77] | 0.46    | 0.70         | 3.60 | [0.73-8.74] | 0.08    | 0.23         | 0.92 | [0.11-2.55] | 0.66    | 0.84         | 1.24        | [0.34-2.72] | 0.88    | 0.95         | 1.52        | [0.56-2.95] | 0.44    | 0.68         |
|                             | None                 | Ref    |             |         |              | Ref  |             |         |              | Ref  |             |         |              | Ref  |             |         |              | Ref         |             |         |              | Ref         |             |         |              |
| DIC                         |                      | 47,080 |             |         | 54,373       |      |             |         |              |      |             |         |              |      |             |         |              |             |             |         |              |             |             |         |              |
| Cerebrovascular Disease     |                      | 1.08   | [0.82-1.37] | 0.62    | 0.81         | 1.52 | [0.60-2.88] | 0.39    | 0.63         | 1.63 | [0.64-3.08] | 0.31    | 0.56         | 1.24 | [0.68-1.98] | 0.51    | 0.74         | 0.84        | [0.45-1.33] | 0.43    | 0.67         | 0.88        | [0.53-1.33] | 0.52    | 0.74         |
| DIC                         |                      | 47,083 |             |         | 54,371       |      |             |         |              |      |             |         |              |      |             |         |              |             |             |         |              |             |             |         |              |
| Myocardial Infarction       |                      | 1.06   | [0.86-1.29] | 0.58    | 0.79         | 1.17 | [0.50-2.14] | 0.81    | 0.92         | 0.30 | [0.04-0.83] | 0.06    | 0.18         | 1.09 | [0.65-1.65] | 0.80    | 0.92         | 1.34        | [0.91-1.85] | 0.13    | 0.31         | 0.95        | [0.65-1.30] | 0.70    | 0.88         |
| DIC                         |                      | 47,083 |             |         | 54,368       |      |             |         |              |      |             |         |              |      |             |         |              |             |             |         |              |             |             |         |              |
| Paraplegia and Hemiplegia   |                      | 1.59   | [0.96-2.37] | 0.06    | 0.18         | 3.59 | [0.73-8.71] | 0.08    | 0.23         | 2.35 | [0.28-6.56] | 0.47    | 0.70         | 1.78 | [0.49-3.93] | 0.40    | 0.65         | 0.88        | [0.18-2.13] | 0.63    | 0.82         | 1.45        | [0.58-2.71] | 0.45    | 0.69         |
| DIC                         |                      | 47,080 |             |         | 54,373       |      |             |         |              |      |             |         |              |      |             |         |              |             |             |         |              |             |             |         |              |
| Peptic Ulcer Disease        |                      | 1.15   | [0.86-1.48] | 0.37    | 0.61         | 2.56 | [1.09-4.70] | 0.02    | 0.08         | 0.63 | [0.08-1.78] | 0.37    | 0.61         | 0.97 | [0.42-1.76] | 0.80    | 0.92         | 1.44        | [0.85-2.18] | 0.16    | 0.37         | 0.88        | [0.51-1.35] | 0.52    | 0.74         |
| DIC                         |                      | 47,082 |             |         | 54,370       |      |             |         |              |      |             |         |              |      |             |         |              |             |             |         |              |             |             |         |              |
| Peripheral Vascular Disease |                      | 1.37   | [1.08-1.71] | 0.01    | 0.04         | 0.87 | [0.23-1.94] | 0.62    | 0.81         | 1.91 | [0.82-3.50] | 0.12    | 0.29         | 1.15 | [0.61-1.87] | 0.72    | 0.88         | 1.53        | [0.98-2.20] | 0.06    | 0.16         | 1.22        | [0.79-1.76] | 0.38    | 0.63         |
| DIC                         |                      | 47,077 |             |         | 54,366       |      |             |         |              |      |             |         |              |      |             |         |              |             |             |         |              |             |             |         |              |
| Renal Disease               |                      | 1.26   | [1.00-1.55] | 0.04    | 0.14         | 1.23 | [0.55-2.20] | 0.68    | 0.86         | 1.22 | [0.52-2.24] | 0.73    | 0.89         | 1.13 | [0.67-1.71] | 0.70    | 0.88         | 1.31        | [0.87-1.84] | 0.18    | 0.40         | 0.90        | [0.54-1.36] | 0.58    | 0.79         |
| DIC                         |                      | 47,079 |             |         | 54,376       |      |             |         |              |      |             |         |              |      |             |         |              |             |             |         |              |             |             |         |              |

RR: Rate ratio adjusted for age, sex, Body Mass Index and ASA grade; CI: 95% Confidence Interval; Adj. p-value: q-value or adjusted p-value. DIC: Deviance Information Criterion (RRs and 95%CI for ≤3mths to ≥24mths periods are estimated from the same piece-wise exponential multilevel model)

1. Body Mass Index: kg/m<sup>2</sup>
2. American Society of Anaesthesiologists grade of surgical fitness.

**Appendix Table 3: Incidence rate ratios of revision for PJI and 95% confidence intervals for surgical characteristics**

|                                 | Total                              |             |             | ≤3mths       |         |              | 3-6mths     |              |      | 6-12mths     |             |              | 12-24mths |             |             | ≥24mths      |         |              |             |              |         |             |             |         |         |
|---------------------------------|------------------------------------|-------------|-------------|--------------|---------|--------------|-------------|--------------|------|--------------|-------------|--------------|-----------|-------------|-------------|--------------|---------|--------------|-------------|--------------|---------|-------------|-------------|---------|---------|
|                                 | RR                                 | 95%CI       | P-value     | Adj. p-value | RR      | 95%CI        | P-value     | Adj. p-value | RR   | 95%CI        | P-value     | Adj. p-value | RR        | 95%CI       | P-value     | Adj. p-value | RR      | 95%CI        | P-value     | Adj. p-value |         |             |             |         |         |
| <b>Osteoarthritis</b>           | 0.66                               | [0.56-0.77] | <0.0001     | <0.0001      | 0.61    | [0.32-1.17]  | 0.10        | 0.26         | 0.63 | [0.33-1.17]  | 0.11        | 0.28         | 0.58      | [0.39-0.84] | <0.0001     | 0.02         | 0.76    | [0.54-1.07]  | 0.10        | 0.26         | 0.68    | [0.53-0.87] | <0.0001     | 0.01    |         |
| DIC                             | 53,355                             |             |             |              | 61,461  |              |             |              |      |              |             |              |           |             |             |              |         |              |             |              |         |             |             |         |         |
| <b>Trauma</b>                   | 1.94                               | [1.42-2.55] | <0.0001     | <0.0001      | 1.53    | [0.18-4.33]  | 0.85        | 0.93         | 1.26 | [0.15-3.53]  | 0.96        | 0.98         | 2.23      | [1.01-3.94] | 0.03        | 0.12         | 2.16    | [1.15-3.50]  | 0.01        | 0.05         | 1.86    | [1.13-2.78] | 0.01        | 0.04    |         |
| DIC                             | 53,363                             |             |             |              | 61,473  |              |             |              |      |              |             |              |           |             |             |              |         |              |             |              |         |             |             |         |         |
| <b>Previous knee infection</b>  | 4.86                               | [2.71-7.64] | <0.0001     | <0.0001      | 5.47    | [0.14-20.34] | 0.38        | 0.63         | 9.71 | [1.16-27.27] | 0.01        | 0.06         | 1.90      | [0.05-7.04] | 0.96        | 0.98         | 5.00    | [1.36-11.03] | 0.01        | 0.03         | 5.10    | [2.04-9.52] | <0.0001     | <0.0001 |         |
| DIC                             | 53,355                             |             |             |              | 61,464  |              |             |              |      |              |             |              |           |             |             |              |         |              |             |              |         |             |             |         |         |
| <b>Avascular necrosis</b>       | 1.56                               | [0.97-2.33] | 0.06        | 0.17         | 1.15    | [0.03-4.23]  | 0.73        | 0.89         | 2.33 | [0.28-6.51]  | 0.48        | 0.70         | 3.15      | [1.26-5.93] | 0.01        | 0.04         | 1.47    | [0.48-3.02]  | 0.55        | 0.77         | 1.03    | [0.38-2.00] | 0.89        | 0.95    |         |
| DIC                             | 53,375                             |             |             |              | 61,484  |              |             |              |      |              |             |              |           |             |             |              |         |              |             |              |         |             |             |         |         |
| <b>Inflammatory arthropathy</b> | 1.38                               | [1.15-1.65] | <0.0001     | 0.01         | 2.04    | [0.91-3.66]  | 0.07        | 0.19         | 1.98 | [0.93-3.45]  | 0.06        | 0.18         | 1.24      | [0.71-1.91] | 0.47        | 0.70         | 1.22    | [0.79-1.74]  | 0.37        | 0.61         | 1.43    | [1.09-1.83] | 0.01        | 0.04    |         |
| DIC                             | 53,368                             |             |             |              | 61,477  |              |             |              |      |              |             |              |           |             |             |              |         |              |             |              |         |             |             |         |         |
| <b>Other indication</b>         | 1.36                               | [0.85-1.99] | 0.19        | 0.40         | 0.82    | [0.02-3.06]  | 0.54        | 0.75         | 1.45 | [0.17-4.06]  | 0.90        | 0.96         | 0.57      | [0.07-1.60] | 0.31        | 0.56         | 1.18    | [0.43-2.31]  | 0.86        | 0.94         | 1.84    | [0.94-3.05] | 0.06        | 0.18    |         |
| DIC                             | 53,377                             |             |             |              | 61,492  |              |             |              |      |              |             |              |           |             |             |              |         |              |             |              |         |             |             |         |         |
| <b>Surgical approach</b>        | <b>Lateral parapatellar</b>        | 1.08        | [0.79-1.42] | 0.64         | 0.83    | 1.66         | [0.44-3.69] | 0.49         | 0.72 | 4.39         | [2.16-7.45] | <0.0001      | <0.0001   | 1.32        | [0.60-2.34] | 0.52         | 0.74    | 0.84         | [0.38-1.48] | 0.51         | 0.74    | 0.68        | [0.37-1.09] | 0.13    | 0.31    |
|                                 | <b>Midvastus</b>                   | 0.82        | [0.64-1.02] | 0.08         | 0.23    | 0.93         | [0.33-1.87] | 0.71         | 0.88 | 0.76         | [0.24-1.58] | 0.42         | 0.66      | 0.45        | [0.19-0.82] | 0.02         | 0.08    | 0.88         | [0.56-1.28] | 0.48         | 0.70    | 0.86        | [0.59-1.19] | 0.36    | 0.61    |
|                                 | <b>Subvastus</b>                   | 0.91        | [0.67-1.19] | 0.47         | 0.70    | 0.82         | [0.17-2.01] | 0.56         | 0.77 | 0.94         | [0.19-2.28] | 0.71         | 0.88      | 1.35        | [0.66-2.28] | 0.43         | 0.67    | 0.98         | [0.52-1.59] | 0.82         | 0.93    | 0.78        | [0.47-1.18] | 0.25    | 0.49    |
|                                 | <b>Other</b>                       | 1.01        | [0.77-1.28] | 1.00         | 1.00    | 1.02         | [0.32-2.17] | 0.85         | 0.93 | 1.16         | [0.37-2.41] | 0.93         | 0.97      | 0.96        | [0.47-1.63] | 0.77         | 0.91    | 0.98         | [0.57-1.51] | 0.84         | 0.93    | 1.00        | [0.66-1.43] | 0.92    | 0.97    |
|                                 | <b>Medial parapatellar</b>         | Ref         |             |              | Ref     |              |             | Ref          |      |              |             |              | Ref       |             |             |              | Ref     |              |             |              | Ref     |             |             |         |         |
| DIC                             | 53,380                             |             |             |              | 61,477  |              |             |              |      |              |             |              |           |             |             |              |         |              |             |              |         |             |             |         |         |
| <b>Procedure</b>                | <b>TKR uncemented</b>              | 0.71        | [0.60-0.84] | <0.0001      | <0.0001 | 0.94         | [0.45-1.63] | 0.72         | 0.88 | 1.56         | [0.89-2.43] | 0.11         | 0.27      | 0.62        | [0.37-0.92] | 0.03         | 0.10    | 0.86         | [0.61-1.15] | 0.30         | 0.56    | 0.55        | [0.41-0.71] | <0.0001 | <0.0001 |
|                                 | <b>TKR other</b>                   | 0.89        | [0.66-1.16] | 0.38         | 0.63    | 1.15         | [0.23-2.82] | 0.95         | 0.98 | 0.37         | [0.01-1.38] | 0.22         | 0.45      | 1.30        | [0.61-2.25] | 0.53         | 0.75    | 1.14         | [0.63-1.81] | 0.72         | 0.88    | 0.81        | [0.51-1.19] | 0.29    | 0.55    |
|                                 | <b>Patellofemoral</b>              | 0.33        | [0.19-0.50] | <0.0001      | <0.0001 |              |             |              |      | 0.35         | [0.01-1.30] | 0.21         | 0.43      | 0.49        | [0.13-1.09] | 0.12         | 0.29    | 0.15         | [0.02-0.43] | 0.01         | 0.04    | 0.38        | [0.18-0.68] | <0.0001 | 0.02    |
|                                 | <b>Unicondylar</b>                 | 0.54        | [0.46-0.61] | <0.0001      | <0.0001 | 0.53         | [0.27-0.88] | 0.02         | 0.09 | 1.04         | [0.63-1.55] | 0.97         | 0.98      | 0.42        | [0.27-0.60] | <0.0001      | <0.0001 | 0.46         | [0.33-0.61] | <0.0001      | <0.0001 | 0.56        | [0.45-0.68] | <0.0001 | <0.0001 |
|                                 | <b>TKR cemented</b>                | Ref         |             |              | Ref     |              |             | Ref          |      |              |             |              | Ref       |             |             |              | Ref     |              |             |              | Ref     |             |             |         |         |
| DIC                             | 53,270                             |             |             |              | 61,357  |              |             |              |      |              |             |              |           |             |             |              |         |              |             |              |         |             |             |         |         |
| <b>Type of constraint</b>       | <b>Unconstrained Mobile</b>        | 1.02        | [0.89-1.17] | 0.79         | 0.92    | 1.43         | [0.82-2.24] | 0.20         | 0.42 | 1.29         | [0.74-2.00] | 0.38         | 0.63      | 0.93        | [0.65-1.27] | 0.63         | 0.82    | 1.16         | [0.89-1.47] | 0.29         | 0.55    | 0.97        | [0.79-1.17] | 0.71    | 0.88    |
|                                 | <b>Posterior Stabilised Fixed</b>  | 1.38        | [1.27-1.50] | <0.0001      | <0.0001 | 1.41         | [1.01-1.90] | 0.04         | 0.14 | 1.34         | [0.96-1.80] | 0.09         | 0.23      | 1.41        | [1.16-1.69] | <0.0001      | 0.01    | 1.32         | [1.12-1.53] | <0.0001      | 0.01    | 1.40        | [1.24-1.59] | <0.0001 | <0.0001 |
|                                 | <b>Posterior Stabilised Mobile</b> | 0.90        | [0.67-1.18] | 0.44         | 0.68    | 0.86         | [0.17-2.14] | 0.60         | 0.81 | 0.91         | [0.18-2.24] | 0.66         | 0.85      | 0.96        | [0.43-1.71] | 0.78         | 0.91    | 0.85         | [0.44-1.42] | 0.50         | 0.73    | 1.03        | [0.67-1.48] | 0.96    | 0.98    |
|                                 | <b>Constrained Condylar</b>        | 3.50        | [2.52-4.65] | <0.0001      | <0.0001 | 4.02         | [1.07-9.02] | 0.02         | 0.09 | 3.30         | [0.66-8.11] | 0.11         | 0.28      | 2.75        | [1.10-5.20] | 0.02         | 0.08    | 3.60         | [1.90-5.87] | <0.0001      | <0.0001 | 3.50        | [1.99-5.46] | <0.0001 | <0.0001 |
|                                 | <b>Fixed</b>                       | 0.72        | [0.56-0.92] | 0.01         | 0.04    | 1.06         | [0.43-2.03] | 0.97         | 0.98 | 1.17         | [0.46-2.25] | 0.85         | 0.93      | 0.69        | [0.35-1.14] | 0.17         | 0.38    | 0.56         | [0.30-0.90] | 0.03         | 0.10    | 0.70        | [0.45-1.01] | 0.07    | 0.19    |
|                                 | <b>Mobile</b>                      | 0.57        | [0.48-0.68] | <0.0001      | <0.0001 | 0.39         | [0.12-0.83] | 0.03         | 0.12 | 1.10         | [0.59-1.80] | 0.83         | 0.93      | 0.37        | [0.20-0.59] | <0.0001      | <0.0001 | 0.50         | [0.34-0.70] | <0.0001      | <0.0001 | 0.65        | [0.50-0.81] | <0.0001 | <0.0001 |
|                                 | <b>Undetermined</b>                | 1.11        | [0.90-1.33] | 0.34         | 0.59    | 1.54         | [0.65-2.86] | 0.34         | 0.59 | 1.64         | [0.73-2.96] | 0.23         | 0.46      | 1.02        | [0.57-1.60] | 0.95         | 0.98    | 1.21         | [0.80-1.70] | 0.37         | 0.62    | 0.98        | [0.71-1.30] | 0.85    | 0.93    |
| DIC                             | Ref                                |             |             | Ref          |         |              | Ref         |              |      |              |             | Ref          |           |             |             | Ref          |         |              |             | Ref          |         |             |             |         |         |
| DIC                             | 53,216                             |             |             |              | 61,333  |              |             |              |      |              |             |              |           |             |             |              |         |              |             |              |         |             |             |         |         |
| <b>General Anaesthesia</b>      | 1.11                               | [1.04-1.20] | <0.0001     | 0.02         | 1.05    | [0.79-1.36]  | 0.79        | 0.92         | 1.27 | [0.96-1.63]  | 0.09        | 0.24         | 1.19      | [1.00-1.40] | 0.05        | 0.16         | 1.12    | [0.98-1.28]  | 0.09        | 0.24         | 1.13    | [1.01-1.25] | 0.03        | 0.11    |         |
| DIC                             | 53,372                             |             |             |              | 61,473  |              |             |              |      |              |             |              |           |             |             |              |         |              |             |              |         |             |             |         |         |
| <b>Nerve Block Anaesthesia</b>  | 1.02                               | [0.94-1.11] | 0.60        | 0.81         | 1.23    | [0.87-1.67]  | 0.24        | 0.48         | 1.00 | [0.70-1.37]  | 0.94        | 0.98         | 1.03      | [0.84-1.26] | 0.78        | 0.91         | 1.02    | [0.87-1.20]  | 0.80        | 0.92         | 1.00    | [0.88-1.14] | 0.97        | 0.98    |         |
| DIC                             | 53,378                             |             |             |              | 61,485  |              |             |              |      |              |             |              |           |             |             |              |         |              |             |              |         |             |             |         |         |
| <b>Epidural Anaesthesia</b>     | 0.89                               | [0.79-0.99] | 0.04        | 0.14         | 0.55    | [0.28-0.92]  | 0.03        | 0.12         | 1.06 | [0.64-1.59]  | 0.90        | 0.96         | 0.82      | [0.58-1.09] | 0.18        | 0.39         | 1.03    | [0.82-1.27]  | 0.83        | 0.93         | 0.99    | [0.84-1.16] | 0.88        | 0.95    |         |
| DIC                             | 53,374                             |             |             |              | 61,484  |              |             |              |      |              |             |              |           |             |             |              |         |              |             |              |         |             |             |         |         |
| <b>Spinal Anaesthesia</b>       | 0.90                               | [0.84-0.97] | <0.0001     | 0.02         | 1.06    | [0.80-1.37]  | 0.75        | 0.90         | 0.77 | [0.59-0.99]  | 0.04        | 0.14         | 0.84      | [0.71-0.99] | 0.04        | 0.14         | 0.89    | [0.78-1.02]  | 0.09        | 0.24         | 0.88    | [0.79-0.97] | 0.01        | 0.06    |         |
| DIC                             | 53,371                             |             |             |              | 61,466  |              |             |              |      |              |             |              |           |             |             |              |         |              |             |              |         |             |             |         |         |
| <b>Thrombop-regimen</b>         | <b>Not chemical</b>                | 0.88        | [0.78-0.98] | 0.02         | 0.09    | 1.00         | [0.62-1.49] | 0.92         | 0.97 | 0.96         | [0.59-1.42] | 0.75         | 0.90      | 1.02        | [0.76-1.32] | 0.95         | 0.98    | 0.96         | [0.77-1.19] | 0.70         | 0.88    | 0.93        | [0.79-1.08] | 0.33    | 0.59    |
|                                 | <b>Chemical</b>                    | Ref         |             |              | Ref     |              |             | Ref          |      |              |             | Ref          |           |             |             | Ref          |         |              |             | Ref          |         |             |             |         |         |
| DIC                             | 53,373                             |             |             |              | 61,484  |              |             |              |      |              |             |              |           |             |             |              |         |              |             |              |         |             |             |         |         |
| <b>Tibial bone graft</b>        | 1.95                               | [1.31-2.71] | <0.0001     | <0.0001      | 2.92    | [0.60-7.11]  | 0.16        | 0.37         | 0.96 | [0.02-3.59]  | 0.63        | 0.82         | 1.50      | [0.41-3.28] | 0.61        | 0.81         | 3.22    | [1.72-5.21]  | <0.0001     | <0.0001      | 1.35    | [0.62-2.38] | 0.47        | 0.70    |         |
| DIC                             | 53,368                             |             |             |              | 61,476  |              |             |              |      |              |             |              |           |             |             |              |         |              |             |              |         |             |             |         |         |
| <b>Femoral bone graft</b>       | 1.56                               | [1.00-2.25] | 0.04        | 0.14         | 1.51    | [0.18-4.25]  | 0.86        | 0.94         |      |              |             |              | 0.87      | [0.18-2.11] | 0.62        | 0.81         | 1.79    | [0.81-3.15]  | 0.13        | 0.31         | 1.82    | [0.87-3.11] | 0.09        | 0.25    |         |
| DIC                             | 53,375                             |             |             |              | 61,483  |              |             |              |      |              |             |              |           |             |             |              |         |              |             |              |         |             |             |         |         |
| <b>Intra operative event</b>    | 1.19                               | [0.75-1.73] | 0.48        | 0.70         | 2.40    | [0.48-5.93]  | 0.28        | 0.54         |      |              |             |              | 1.14      | [0.31-2.53] | 1.00        | 1.00         | 1.46    | [0.63-2.67]  | 0.39        | 0.63         | 0.98    | [0.42-1.77] | 0.82        | 0.93    |         |
| DIC                             | 53,378                             |             |             |              | 61,486  |              |             |              |      |              |             |              |           |             |             |              |         |              |             |              |         |             |             |         |         |

RR: Rate ratio adjusted for age, sex, BMI and ASA grade; CI: 95% Confidence Interval; Adj. p-value: q-value or adjusted p-value. DIC: Deviance Information Criterion (RRs and 95%CI for ≤3mths to ≥24mths periods are estimated from the same piece-wise exponential multilevel model) TKR: Total knee replacement

**Appendix Table 4: Incidence rate ratios of revision for PJI and 95% confidence intervals for health system characteristics**

|                              |                 | Total  |             |         | ≤3mths       |      |             | 3-6mths |              |      | 6-12mths    |         |              | 12-24mths |             |         | ≥24mths      |      |             | Adj. p-value |         |      |             |         |         |
|------------------------------|-----------------|--------|-------------|---------|--------------|------|-------------|---------|--------------|------|-------------|---------|--------------|-----------|-------------|---------|--------------|------|-------------|--------------|---------|------|-------------|---------|---------|
|                              |                 | RR     | 95%CI       | P-value | Adj. p-value | RR   | 95%CI       | P-value | Adj. p-value | RR   | 95%CI       | P-value | Adj. p-value | RR        | 95%CI       | P-value | Adj. p-value | RR   | 95%CI       |              | P-value |      |             |         |         |
| Place of surgery             | Wales           | 0.88   | [0.70-1.08] | 0.21    | 0.43         | 1.22 | [0.59-2.18] | 0.67    | 0.85         | 0.77 | [0.37-1.34] | 0.34    | 0.59         | 0.66      | [0.41-0.99] | 0.05    | 0.16         | 0.80 | [0.56-1.10] | 0.17         | 0.38    | 1.00 | [0.77-1.29] | 0.98    | 0.99    |
|                              | England         | Ref    |             |         |              | Ref  |             |         |              | Ref  |             |         |              | Ref       |             |         | Ref          |      |             |              | Ref     |      |             |         |         |
| DIC                          |                 | 53,378 |             |         | 61,487       |      |             |         |              |      |             |         |              |           |             |         |              |      |             |              |         |      |             |         |         |
| Funding                      | Private         | 0.85   | [0.75-0.95] | 0.01    | 0.03         | 1.12 | [0.71-1.64] | 0.67    | 0.86         | 1.36 | [0.91-1.92] | 0.13    | 0.31         | 1.14      | [0.87-1.46] | 0.34    | 0.59         | 0.76 | [0.59-0.96] | 0.02         | 0.09    | 0.71 | [0.59-0.85] | <0.0001 | <0.0001 |
|                              | Unspecified NHS | 0.84   | [0.72-0.97] | 0.02    | 0.09         | 1.04 | [0.48-1.84] | 0.96    | 0.98         | 0.81 | [0.34-1.49] | 0.46    | 0.70         | 1.00      | [0.64-1.44] | 0.92    | 0.97         | 1.03 | [0.74-1.38] | 0.90         | 0.96    | 0.90 | [0.73-1.09] | 0.29    | 0.55    |
| DIC                          |                 | 53,371 |             |         | 61,482       |      |             |         |              |      |             |         |              |           |             |         |              |      |             |              |         |      |             |         |         |
| Grade operating surgeon      | Other           | 0.99   | [0.90-1.08] | 0.79    | 0.92         | 0.84 | [0.55-1.19] | 0.32    | 0.57         | 1.39 | [0.99-1.88] | 0.05    | 0.16         | 1.01      | [0.80-1.25] | 0.95    | 0.98         | 1.14 | [0.95-1.34] | 0.16         | 0.36    | 0.98 | [0.85-1.12] | 0.78    | 0.91    |
|                              | Consultant      | Ref    |             |         |              | Ref  |             |         |              | Ref  |             |         |              | Ref       |             |         | Ref          |      |             |              | Ref     |      |             |         |         |
| DIC                          |                 | 53,378 |             |         | 61,489       |      |             |         |              |      |             |         |              |           |             |         |              |      |             |              |         |      |             |         |         |
| Consultant involved          | None involved   | 0.96   | [0.86-1.07] | 0.47    | 0.70         | 0.67 | [0.38-1.07] | 0.11    | 0.27         | 1.33 | [0.86-1.92] | 0.20    | 0.41         | 1.08      | [0.81-1.39] | 0.62    | 0.81         | 1.14 | [0.92-1.39] | 0.22         | 0.44    | 0.96 | [0.81-1.12] | 0.56    | 0.77    |
|                              | Assisting       | 1.04   | [0.90-1.19] | 0.61    | 0.81         | 1.11 | [0.61-1.76] | 0.81    | 0.92         | 1.49 | [0.88-2.30] | 0.13    | 0.31         | 0.90      | [0.61-1.26] | 0.52    | 0.74         | 1.12 | [0.85-1.44] | 0.44         | 0.68    | 1.04 | [0.83-1.27] | 0.77    | 0.91    |
| DIC                          | Operating       | 53,378 |             |         | 61,489       |      |             |         |              |      |             |         |              |           |             |         |              |      |             |              |         |      |             |         |         |
| Total volume                 | >85             | 0.95   | [0.86-1.04] | 0.26    | 0.51         | 1.24 | [0.83-1.78] | 0.31    | 0.57         | 0.91 | [0.61-1.29] | 0.54    | 0.75         | 0.90      | [0.72-1.12] | 0.34    | 0.59         | 0.74 | [0.61-0.88] | <0.0001      | 0.01    | 0.86 | [0.73-0.99] | 0.04    | 0.14    |
|                              | [50-85]         | 0.96   | [0.87-1.05] | 0.34    | 0.59         | 1.23 | [0.83-1.75] | 0.33    | 0.59         | 0.86 | [0.58-1.22] | 0.37    | 0.61         | 0.99      | [0.79-1.22] | 0.85    | 0.93         | 0.78 | [0.65-0.93] | 0.01         | 0.03    | 0.88 | [0.76-1.00] | 0.06    | 0.18    |
| Operating surgeon            | [25-50]         | 1.09   | [1.00-1.19] | 0.05    | 0.16         | 1.25 | [0.85-1.78] | 0.28    | 0.54         | 1.18 | [0.82-1.65] | 0.41    | 0.65         | 0.81      | [0.64-1.01] | 0.06    | 0.19         | 1.00 | [0.85-1.19] | 0.99         | 1.00    | 1.14 | [1.01-1.29] | 0.04    | 0.14    |
|                              | ≤25             | Ref    |             |         |              | Ref  |             |         |              | Ref  |             |         |              | Ref       |             |         | Ref          |      |             |              | Ref     |      |             |         |         |
| DIC                          |                 | 53,373 |             |         | 61,469       |      |             |         |              |      |             |         |              |           |             |         |              |      |             |              |         |      |             |         |         |
| Tot volume Surgeon in charge | >110            | 0.96   | [0.87-1.06] | 0.46    | 0.70         | 1.21 | [0.82-1.74] | 0.37    | 0.61         | 0.88 | [0.60-1.25] | 0.45    | 0.69         | 0.94      | [0.75-1.18] | 0.57    | 0.79         | 0.78 | [0.64-0.93] | 0.01         | 0.03    | 0.88 | [0.75-1.02] | 0.08    | 0.23    |
|                              | [70-110]        | 0.99   | [0.90-1.09] | 0.84    | 0.93         | 1.13 | [0.76-1.63] | 0.58    | 0.79         | 0.98 | [0.67-1.39] | 0.84    | 0.93         | 0.99      | [0.79-1.23] | 0.88    | 0.95         | 0.89 | [0.74-1.05] | 0.17         | 0.38    | 0.86 | [0.74-0.99] | 0.03    | 0.12    |
| DIC                          | [38-70]         | 1.02   | [0.94-1.11] | 0.64    | 0.83         | 1.29 | [0.89-1.82] | 0.19    | 0.41         | 1.04 | [0.72-1.46] | 0.88    | 0.95         | 0.90      | [0.72-1.12] | 0.34    | 0.59         | 0.86 | [0.72-1.01] | 0.07         | 0.19    | 1.04 | [0.92-1.18] | 0.52    | 0.74    |
|                              | ≤38             | Ref    |             |         |              | Ref  |             |         |              | Ref  |             |         |              | Ref       |             |         | Ref          |      |             |              | Ref     |      |             |         |         |
| DIC                          |                 | 53,379 |             |         | 61,482       |      |             |         |              |      |             |         |              |           |             |         |              |      |             |              |         |      |             |         |         |
| Total volume Hospital        | >440            | 1.25   | [1.10-1.42] | <0.0001 | 0.01         | 2.09 | [1.31-3.18] | <0.0001 | 0.01         | 0.95 | [0.63-1.37] | 0.71    | 0.88         | 1.03      | [0.79-1.32] | 0.87    | 0.94         | 1.00 | [0.80-1.23] | 0.94         | 0.98    | 1.00 | [0.84-1.19] | 0.97    | 0.98    |
|                              | [285-440]       | 1.24   | [1.11-1.37] | <0.0001 | <0.0001      | 1.28 | [0.82-1.90] | 0.30    | 0.56         | 0.98 | [0.66-1.40] | 0.84    | 0.93         | 1.01      | [0.79-1.27] | 1.00    | 1.00         | 1.16 | [0.95-1.40] | 0.15         | 0.35    | 1.11 | [0.96-1.29] | 0.17    | 0.38    |
| DIC                          | [150-285]       | 1.15   | [1.04-1.26] | 0.01    | 0.03         | 1.21 | [0.79-1.77] | 0.42    | 0.66         | 0.98 | [0.67-1.39] | 0.83    | 0.93         | 0.96      | [0.76-1.20] | 0.68    | 0.86         | 1.14 | [0.94-1.36] | 0.19         | 0.40    | 1.10 | [0.96-1.25] | 0.20    | 0.41    |
|                              | ≤150            | Ref    |             |         |              | Ref  |             |         |              | Ref  |             |         |              | Ref       |             |         | Ref          |      |             |              | Ref     |      |             |         |         |
| DIC                          |                 | 53,353 |             |         | 61,474       |      |             |         |              |      |             |         |              |           |             |         |              |      |             |              |         |      |             |         |         |

RR: Rate ratio adjusted for age, sex, BMI and ASA grade; CI: 95% Confidence Interval; Adj. p-value: q-value or adjusted p-value. DIC: Deviance Information Criterion (RRs and 95%CI for ≤3mths to ≥24mths periods are estimated from the same piece-wise exponential multilevel model)

STROBE Statement—checklist of items that should be included in reports of observational studies

|                              | <b>Item No</b> | <b>Recommendation</b>                                                                                                                                                                                                                                                                                                                                                                                                                                                                                                                                                                                                                                                                                      |                                                                              |
|------------------------------|----------------|------------------------------------------------------------------------------------------------------------------------------------------------------------------------------------------------------------------------------------------------------------------------------------------------------------------------------------------------------------------------------------------------------------------------------------------------------------------------------------------------------------------------------------------------------------------------------------------------------------------------------------------------------------------------------------------------------------|------------------------------------------------------------------------------|
| <b>Title and abstract</b>    | 1              | (a) Indicate the study's design with a commonly used term in the title or the abstract<br>(b) Provide in the abstract an informative and balanced summary of what was done and what was found                                                                                                                                                                                                                                                                                                                                                                                                                                                                                                              | <b>Page1</b><br><b>Page4</b>                                                 |
| <b>Introduction</b>          |                |                                                                                                                                                                                                                                                                                                                                                                                                                                                                                                                                                                                                                                                                                                            |                                                                              |
| Background/rationale         | 2              | Explain the scientific background and rationale for the investigation being reported                                                                                                                                                                                                                                                                                                                                                                                                                                                                                                                                                                                                                       | <b>Page5</b>                                                                 |
| Objectives                   | 3              | State specific objectives to including any prespecified hypotheses                                                                                                                                                                                                                                                                                                                                                                                                                                                                                                                                                                                                                                         | <b>Page5</b>                                                                 |
| <b>Methods</b>               |                |                                                                                                                                                                                                                                                                                                                                                                                                                                                                                                                                                                                                                                                                                                            |                                                                              |
| Study design                 | 4              | Present key elements of study design early in the paper                                                                                                                                                                                                                                                                                                                                                                                                                                                                                                                                                                                                                                                    | <b>Page6</b>                                                                 |
| Setting                      | 5              | Describe the setting to locations to and relevant dates to including periods of recruitment to exposure to follow-up to and data collection                                                                                                                                                                                                                                                                                                                                                                                                                                                                                                                                                                | <b>Page6</b>                                                                 |
| Participants                 | 6              | (a) <i>Cohort study</i> —Give the eligibility criteria to and the sources and methods of selection of participants. Describe methods of follow-up<br><i>Case-control study</i> —Give the eligibility criteria to and the sources and methods of case ascertainment and control selection. Give the rationale for the choice of cases and controls<br><i>Cross-sectional study</i> —Give the eligibility criteria to and the sources and methods of selection of participants<br>(b) <i>Cohort study</i> —For matched studies to give matching criteria and number of exposed and unexposed<br><i>Case-control study</i> —For matched studies to give matching criteria and the number of controls per case |                                                                              |
| Variables                    | 7              | Clearly define all outcomes to exposures to predictors to potential confounders to and effect modifiers. Give diagnostic criteria to if applicable                                                                                                                                                                                                                                                                                                                                                                                                                                                                                                                                                         | <b>Page6</b>                                                                 |
| Data sources/<br>measurement | 8*             | For each variable of interest to give sources of data and details of methods of assessment (measurement). Describe comparability of assessment methods if there is more than one group                                                                                                                                                                                                                                                                                                                                                                                                                                                                                                                     | <b>Page6</b>                                                                 |
| Bias                         | 9              | Describe any efforts to address potential sources of bias                                                                                                                                                                                                                                                                                                                                                                                                                                                                                                                                                                                                                                                  | <b>Page7</b>                                                                 |
| Study size                   | 10             | Explain how the study size was arrived at                                                                                                                                                                                                                                                                                                                                                                                                                                                                                                                                                                                                                                                                  | <b>Page6 Figure1</b>                                                         |
| Quantitative variables       | 11             | Explain how quantitative variables were handled in the analyses. If applicable to describe which groupings were chosen and why                                                                                                                                                                                                                                                                                                                                                                                                                                                                                                                                                                             | <b>Page6</b>                                                                 |
| Statistical methods          | 12             | (a) Describe all statistical methods to including those used to control for confounding<br>(b) Describe any methods used to examine subgroups and interactions<br>(c) Explain how missing data were addressed<br>(d) <i>Cohort study</i> —If applicable to explain how loss to follow-up was addressed<br><i>Case-control study</i> —If applicable to explain how matching of cases and controls was addressed<br><i>Cross-sectional study</i> —If applicable to describe analytical methods taking account of sampling strategy<br>(e) Describe any sensitivity analyses                                                                                                                                  | <b>Page7</b><br><b>Page7</b><br><b>Page7</b><br><b>Page7</b><br><b>Page7</b> |

Continued on next page

**Results**

|                          |     |                                                                                                                                                                                                                                                                                                                                                                                                                                                                                                                                                                                   |
|--------------------------|-----|-----------------------------------------------------------------------------------------------------------------------------------------------------------------------------------------------------------------------------------------------------------------------------------------------------------------------------------------------------------------------------------------------------------------------------------------------------------------------------------------------------------------------------------------------------------------------------------|
| Participants             | 13* | (a) Report numbers of individuals at each stage of study—eg numbers potentially eligible to examined for eligibility to confirmed eligible to included in the study to completing follow-up to and analysed <b>Figure1 Page9</b><br>(b) Give reasons for non-participation at each stage <b>Figure1</b><br>(c) Consider use of a flow diagram <b>Figure1</b>                                                                                                                                                                                                                      |
| Descriptive data         | 14* | (a) Give characteristics of study participants (eg demographic to clinical to social) and information on exposures and potential confounders <b>Figure1+tables in doc</b><br>(b) Indicate number of participants with missing data for each variable of interest <b>Tables in doc+Tables in appendix</b><br>(c) <i>Cohort study</i> —Summarise follow-up time (eg to average and total amount) <b>Tables in doc+Tables in appendix</b>                                                                                                                                            |
| Outcome data             | 15* | <i>Cohort study</i> —Report numbers of outcome events or summary measures over time <b>Tables in doc+Tables in appendix</b><br><i>Case-control study</i> —Report numbers in each exposure category to or summary measures of exposure<br><i>Cross-sectional study</i> —Report numbers of outcome events or summary measures                                                                                                                                                                                                                                                       |
| Main results             | 16  | (a) Give unadjusted estimates and to if applicable to confounder-adjusted estimates and their precision (eg to 95% confidence interval). Make clear which confounders were adjusted for and why they were included <b>Tables in doc+Tables in appendix+Figures 2-3 &amp; Figures in appendix</b><br>(b) Report category boundaries when continuous variables were categorized <b>Tables in doc+Tables in appendix+Figures 2-3 &amp; Figures in appendix</b><br>(c) If relevant to consider translating estimates of relative risk into absolute risk for a meaningful time period |
| Other analyses           | 17  | Report other analyses done—eg analyses of subgroups and interactions to and sensitivity analyses                                                                                                                                                                                                                                                                                                                                                                                                                                                                                  |
| <b>Discussion</b>        |     |                                                                                                                                                                                                                                                                                                                                                                                                                                                                                                                                                                                   |
| Key results              | 18  | Summarise key results with reference to study objectives <b>Page12</b>                                                                                                                                                                                                                                                                                                                                                                                                                                                                                                            |
| Limitations              | 19  | Discuss limitations of the study to taking into account sources of potential bias or imprecision. Discuss both direction and magnitude of any potential bias <b>Page13</b>                                                                                                                                                                                                                                                                                                                                                                                                        |
| Interpretation           | 20  | Give a cautious overall interpretation of results considering objectives to limitations to multiplicity of analyses to results from similar studies to and other relevant evidence <b>Pages12-13</b>                                                                                                                                                                                                                                                                                                                                                                              |
| Generalisability         | 21  | Discuss the generalisability (external validity) of the study results evidence <b>Pages13-14</b>                                                                                                                                                                                                                                                                                                                                                                                                                                                                                  |
| <b>Other information</b> |     |                                                                                                                                                                                                                                                                                                                                                                                                                                                                                                                                                                                   |
| Funding                  | 22  | Give the source of funding and the role of the funders for the present study and to if applicable to for the original study on which the present article is based <b>Page8+Page15</b>                                                                                                                                                                                                                                                                                                                                                                                             |

\*Give information separately for cases and controls in case-control studies and to if applicable to for exposed and unexposed groups in cohort and cross-sectional studies.

**Note:** An Explanation and Elaboration article discusses each checklist item and gives methodological background and published examples of transparent reporting. The STROBE checklist is best used in conjunction with this article (freely available on the Web sites of PLoS Medicine at <http://www.plosmedicine.org/> to Annals of Internal Medicine at <http://www.annals.org/> to and Epidemiology at <http://www.epidem.com/>). Information on the STROBE Initiative is available at [www.strobe-statement.org](http://www.strobe-statement.org).

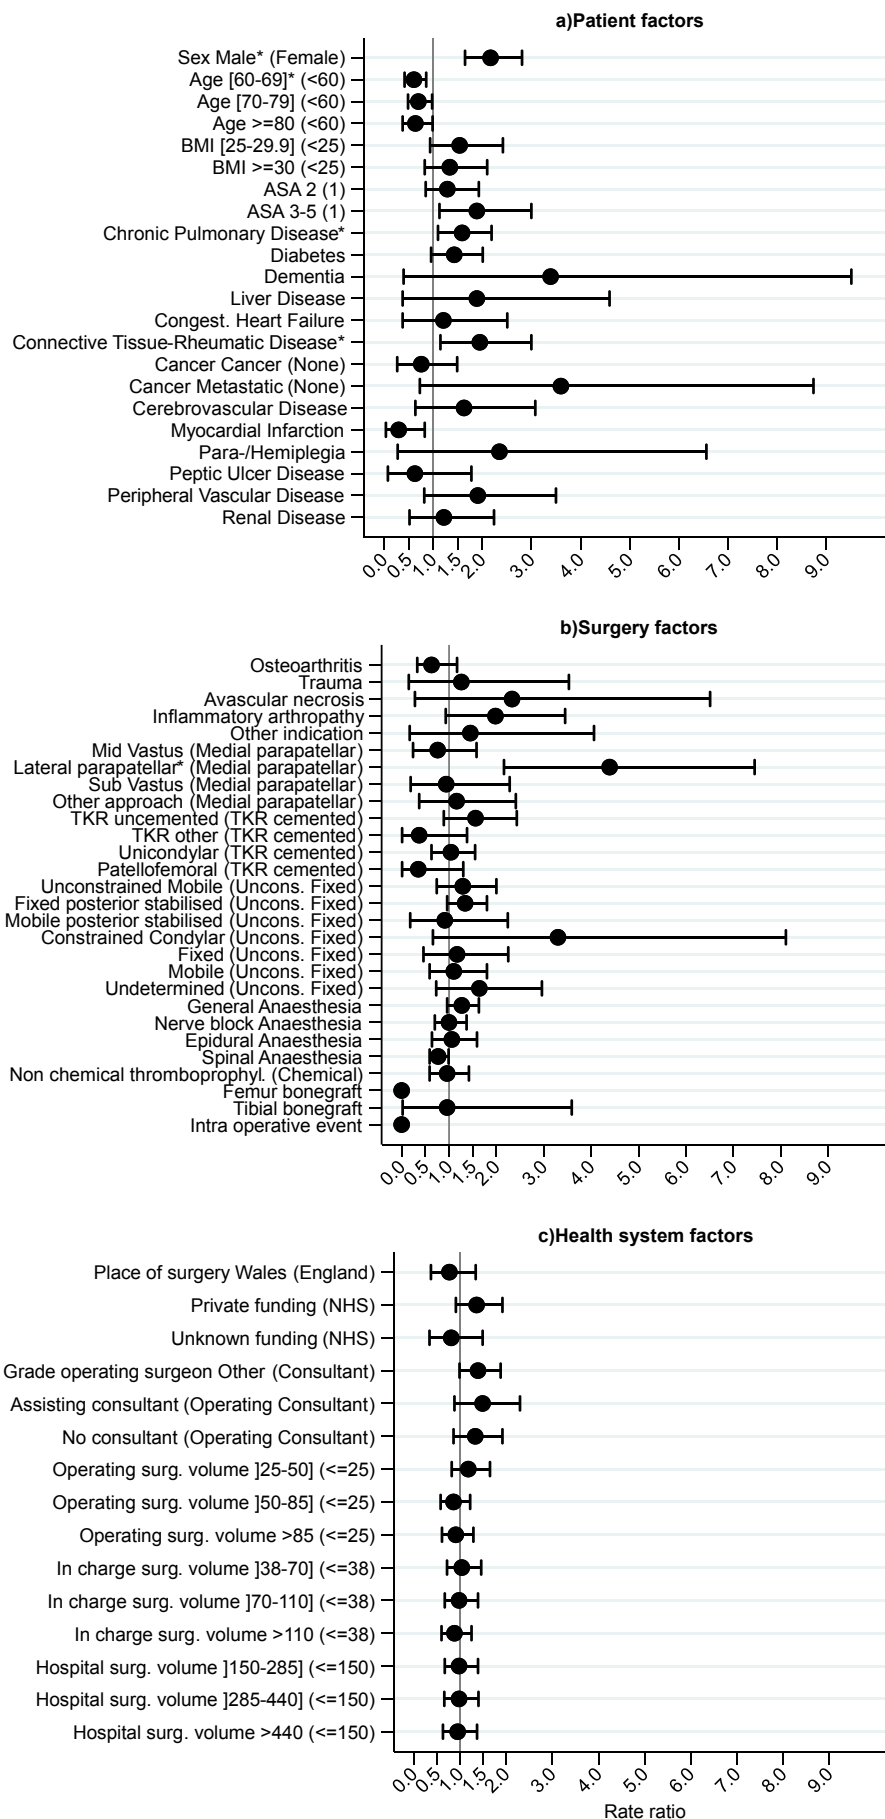

**Appendix Figure 1: Risk factors of revision for prosthetic joint infection for the 3-6 postoperative months (Reference category in bracket)**

\*Adjusted p-value<0.05, detailed in Appendix tables 2-4 alongside the rate ratios and confidence intervals. BMI: Body Mass Index, ASA: American Society of Anaesthesiologists, TKR: Total knee replacement



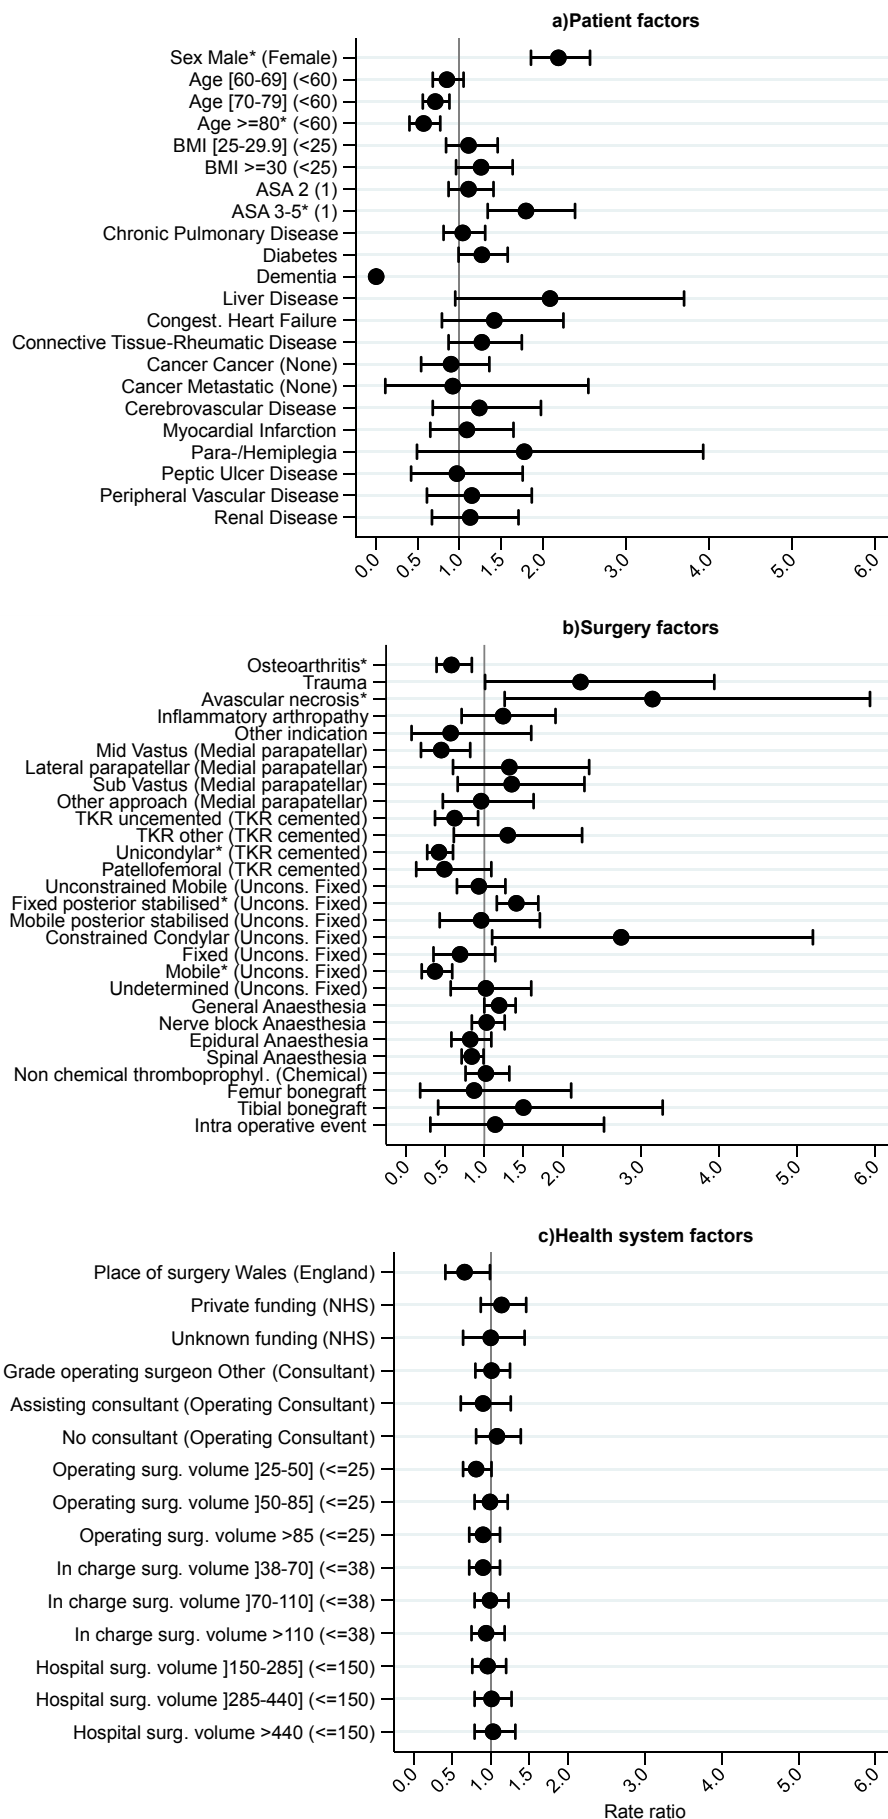

**Appendix Figure 2: Risk factors of revision for prosthetic joint infection for the 6-12 postoperative months (Reference category in bracket)**

\*Adjusted p-value<0.05, detailed in Appendix tables 2-4 alongside the rate ratios and confidence intervals. BMI: Body Mass Index, ASA: American Society of Anaesthesiologists, TKR: Total knee replacement

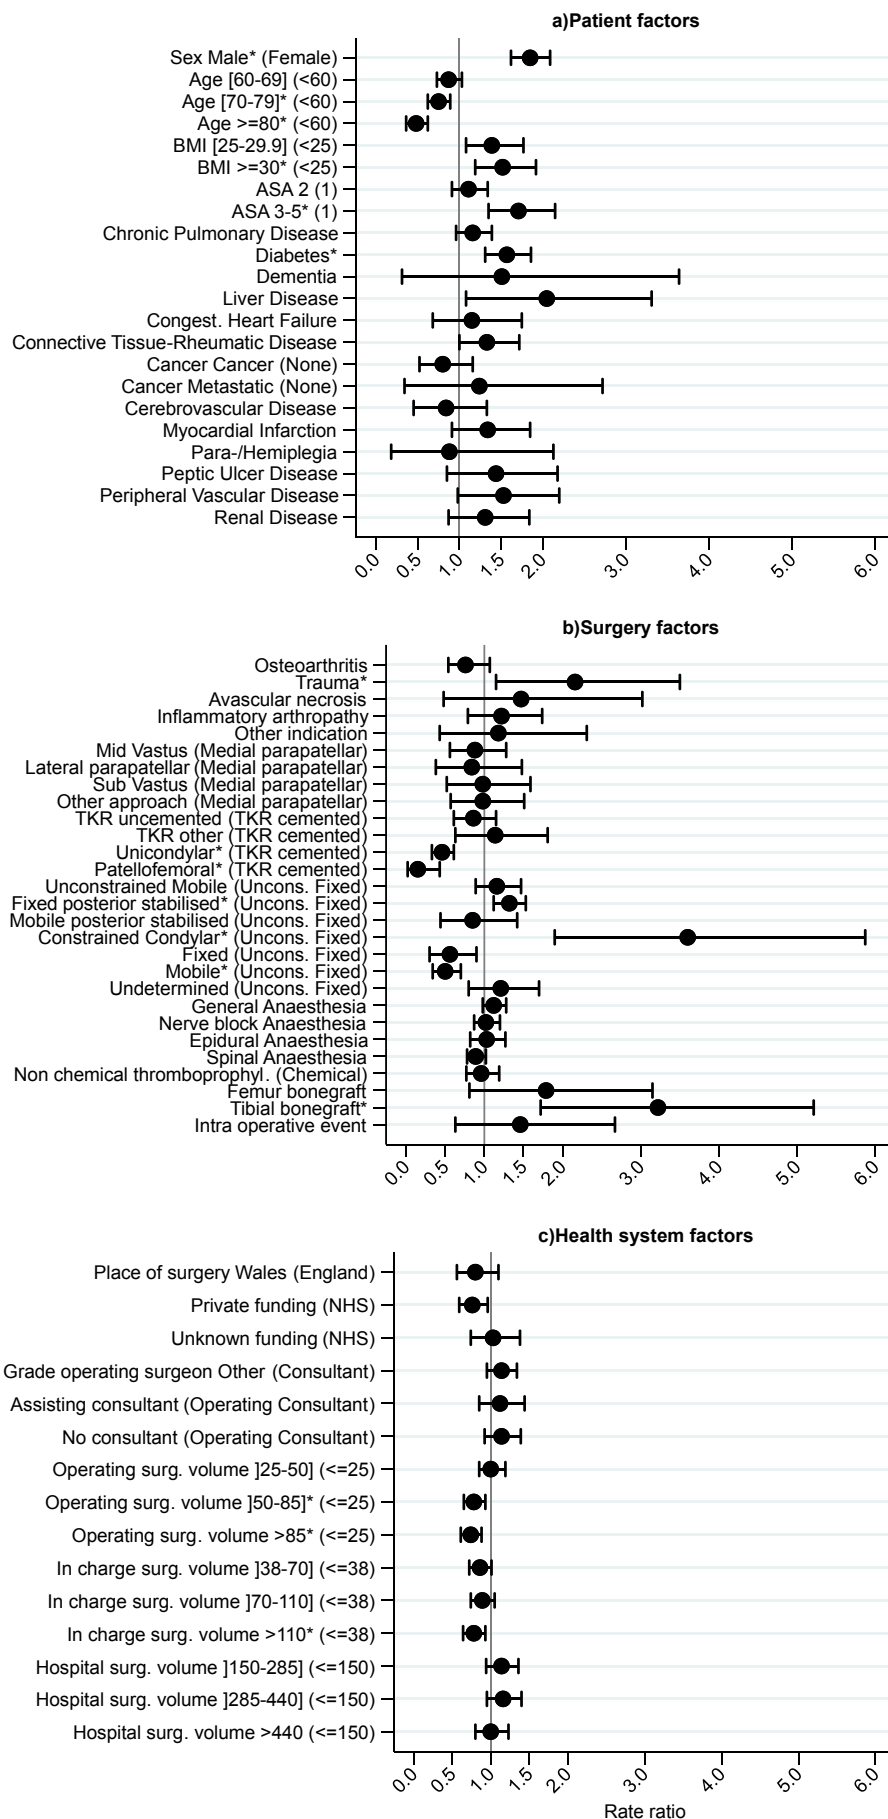

**Appendix Figure 3: Risk factors of revision for prosthetic joint infection for the 12-24 postoperative months (Reference category in bracket)**

\*Adjusted p-value<0.05, detailed in Appendix tables 2-4 alongside the rate ratios and confidence intervals. BMI: Body Mass Index, ASA: American Society of Anaesthesiologists, TKR: Total knee replacement

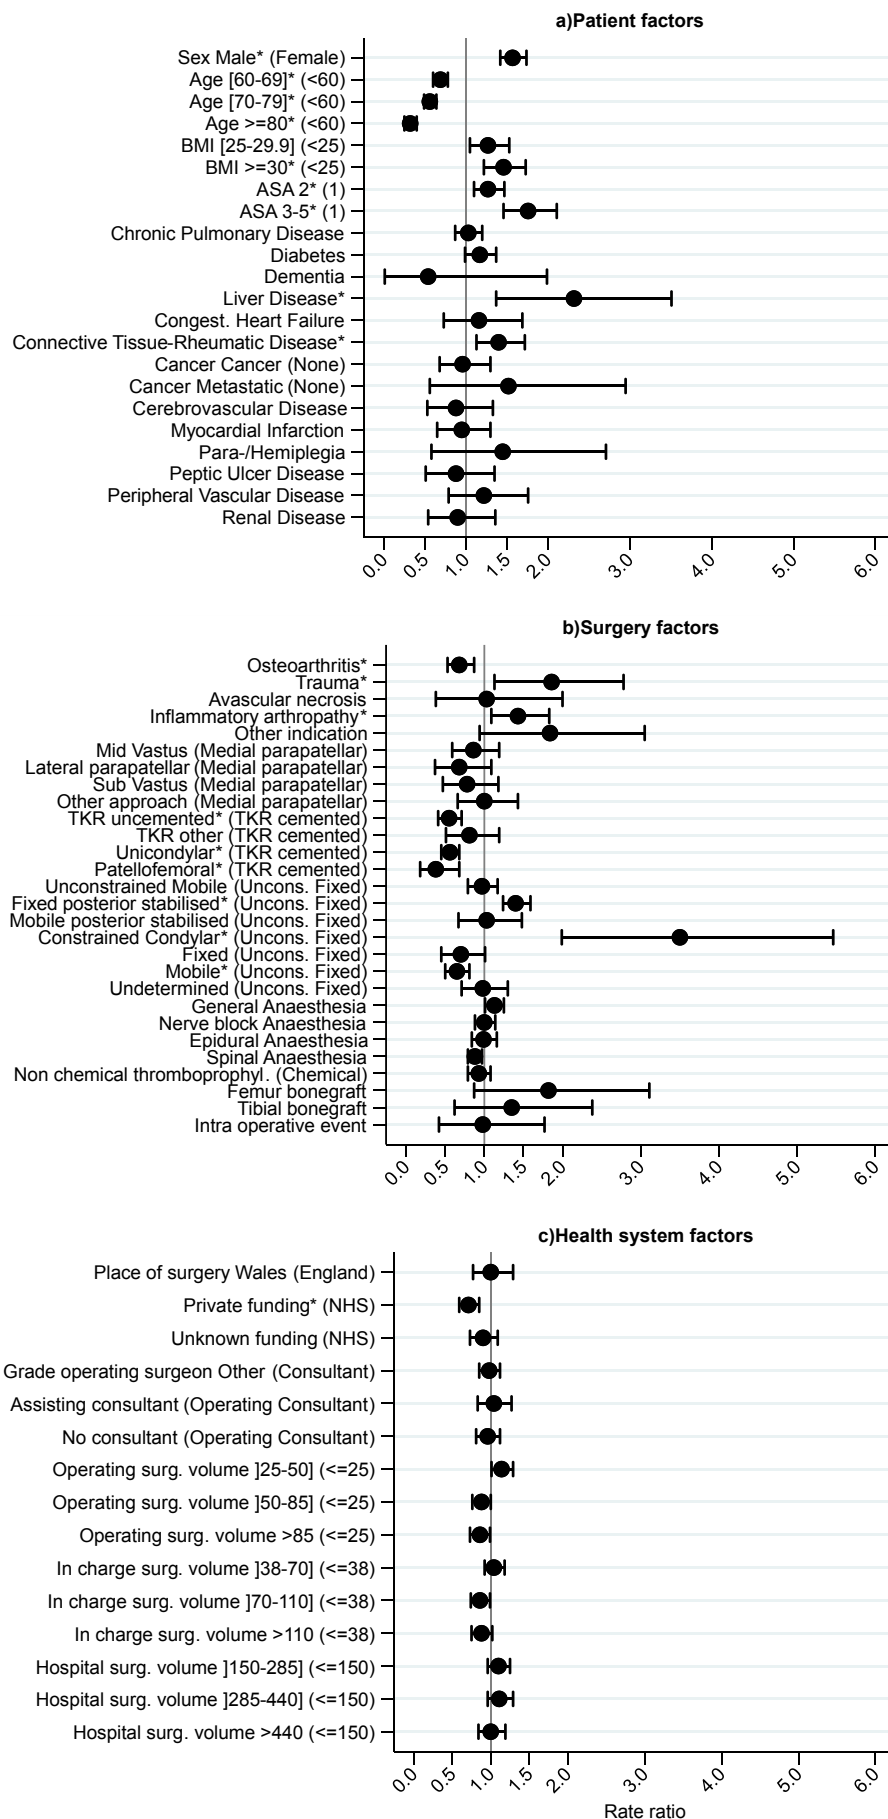

**Appendix Figure 4: Risk factors of revision for prosthetic joint infection for the ≥24 postoperative months (Reference category in bracket)**

\*Adjusted p-value<0.05, detailed in Appendix tables 2-4 alongside the rate ratios and confidence intervals. BMI: Body Mass Index, ASA: American Society of Anaesthesiologists, TKR: Total knee replacement
